# Supplementary material for: Palladium-catalyzed three-component tandem reaction of sulfonyl hydrazones, aryl iodides and allenes: highly stereoselective synthesis of (Z)-α-hydroxymethyl allylic sulfones
Source: Royal Society of Chemistry journal article supplement (doi:10.1039/c7ra08208h), 2017-01-01

## Electronic Supplementary Information

### **Palladium-Catalyzed Three-Component Tandem Reaction of Sulfonyl Hydrazones, Aryl Iodides and Allenes: Highly Stereoselective Synthesis of (*Z*)- $\alpha$ -Hydroxymethyl Allylic Sulfones**

Yunlei Hou, Qi Shen, Liangyu Zhu, Yufei Han, Yanfang Zhao, Mingze Qin\*, Ping Gong\*[a]

Key Laboratory of Structure-based Drug Design and Discovery, Ministry of Education, Shenyang Pharmaceutical University, Shenyang 110016, P. R. China

## Contents

|                                                                                |       |
|--------------------------------------------------------------------------------|-------|
| 1. General Information .....                                                   | S2    |
| 2. General Procedure and Product Characterization .....                        | S2    |
| 2.1 The Optimal Experimental Conditions .....                                  | S2    |
| 2.2 Product Characterization.....                                              | S2-7  |
| 3. The Structural Confirmation of the Representative Compound <b>4aa</b> ..... | S7-8  |
| 4. NMR Spectra of New Compounds .....                                          | S9-26 |

## 1. General Information

Unless otherwise noted, all reagents and solvents were obtained from commercial sources and used without further purification. Solvents were dried using standard methods and distilled before use. Reactions were monitored by thin-layer chromatography (TLC) on silica plates (F-254) and visualized under UV light. Melting points were obtained on a Büchi Melting Point B-540 apparatus and were uncorrected. All  $^1\text{H}$  NMR and  $^{13}\text{C}$  NMR spectra were recorded on Bruker ARX-400, 400 MHz spectrometers with TMS as an internal standard. The peak patterns are indicated as follows: s, singlet; d, doublet; t, triplet; m, multiplet; q, quartet. The coupling constants,  $J$ , are reported in hertz (Hz). HRMS analysis was performed on a Q-TOF mass analyzer using the ESI ionization method. Column chromatography was run on silica gel (200-300 mesh) from Qingdao Ocean Chemicals (Qingdao, Shandong, China).

## 2. General Procedure and Product Characterization

### 2.1 The Optimal Experimental Conditions

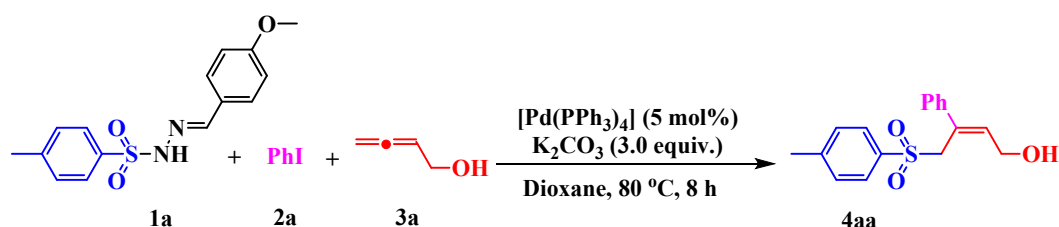

Representative procedure for the synthesis of (*Z*)- $\alpha$ -hydroxymethyl allylic sulfone products: buta-2,3-dien-1-ol **3a** (28 mg, 0.39 mmol) and iodobenzene **2a** (81 mg, 0.39 mmol, 1.2 equiv.) were consecutively added to a sealed tube charged with a mixture of K<sub>2</sub>CO<sub>3</sub> (136 mg, 0.99 mmol, 3.0 equiv.), [Pd(PPh<sub>3</sub>)<sub>4</sub>] (19 mg, 0.018 mmol, 5 mol%), and sulfonyl hydrazone **1a** (100 mg, 0.33 mmol, 1 equiv.) in dioxane (5 mL), under an atmosphere of nitrogen. The reaction mixture was stirred at 80 °C for 8 h and analyzed by TLC. After the reaction was complete, water (10 mL) was added, and the solution was extracted with dichloromethane. The organic phase was separated, washed with brine, dried (MgSO<sub>4</sub>), filtered, and concentrated in vacuo to give the crude product, which was purified by column chromatography on silica gel with a mixture of ethyl acetate/petroleum (10:10, v/v) to afford the desired product **4aa**.

### 2.2 Product Characterization

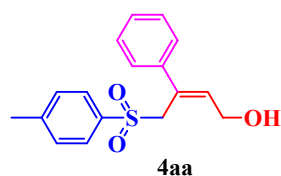

(*Z*)-3-phenyl-4-tosylbut-2-en-1-ol (**4aa**)

Yield: 78% (77 mg), white solid, m.p.: 61.1-62.5 °C.  $^1\text{H}$  NMR (400 MHz, DMSO-*d*<sub>6</sub>)  $\delta_{\text{H}}$  7.63 (d,  $J$  = 8.2 Hz, 2H), 7.38-7.34 (m, 2H), 7.31-7.16 (m, 3H), 6.05 (t,  $J$  = 6.2 Hz, 1H), 4.76 (t,  $J$  = 5.4 Hz, 1H), 4.56 (s, 2H), 3.85 (t,  $J$  = 5.8 Hz, 2H), 2.37 (s, 3H).  $^{13}\text{C}$  NMR (101 MHz, DMSO-*d*<sub>6</sub>)  $\delta_{\text{C}}$  144.75, 140.95, 138.56, 136.37, 130.05, 128.58, 128.16, 127.57, 126.81, 58.75, 57.15, 21.51. HRMS (ESI-Q-TOF,  $m/z$ ) calcd for C<sub>17</sub>H<sub>18</sub>O<sub>3</sub>S [M + Na]<sup>+</sup>: 325.0836, found [M + Na]<sup>+</sup>: 325.0874.

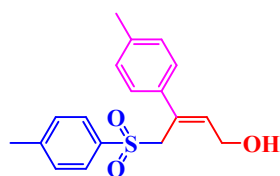

**4ba** (Z)-3-(p-tolyl)-4-tosylbut-2-en-1-ol (4ba)

Yield: 82% (85 mg), white solid, m.p.:78.3-79.1 °C. <sup>1</sup>H NMR (600 MHz, DMSO-*d*<sub>6</sub>) δ<sub>H</sub> 7.61 (d, *J* = 8.2 Hz, 2H), 7.35 (d, *J* = 8.0 Hz, 2H), 7.25 (d, *J* = 8.1 Hz, 2H), 7.06 (d, *J* = 7.9 Hz, 2H), 6.01 (t, *J* = 6.2 Hz, 1H), 4.71 (t, *J* = 5.4 Hz, 1H), 4.51 (s, 2H), 3.82 (t, *J* = 5.8 Hz, 2H), 2.37 (s, 3H), 2.27 (s, 3H). <sup>13</sup>C NMR (151 MHz, DMSO-*d*<sub>6</sub>) δ<sub>C</sub> 144.75, 138.05, 137.55, 136.86, 136.35, 130.04, 129.17, 128.57, 127.99, 126.70, 58.67, 57.07, 21.51, 21.06. HRMS (ESI-Q-TOF, m/z) calcd for C<sub>18</sub>H<sub>20</sub>O<sub>3</sub>S [M + Na]<sup>+</sup>: 339.1056, found [M + Na]<sup>+</sup>: 339.1031.

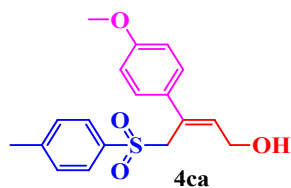

**4ca** (Z)-3-(4-methoxyphenyl)-4-tosylbut-2-en-1-ol (4ca)

Yield:88% (96 mg), white solid, m.p.:71.3-72.8 °C. <sup>1</sup>H NMR (400 MHz, DMSO-*d*<sub>6</sub>) δ<sub>H</sub> 7.62 (d, *J* = 8.0 Hz, 2H), 7.35 (d, *J* = 8.0 Hz, 2H), 7.30 (d, *J* = 8.6 Hz, 2H), 6.81 (d, *J* = 8.6 Hz, 2H), 5.96 (t, *J* = 6.1 Hz, 1H), 4.71 (t, *J* = 5.2 Hz, 1H), 4.51 (s, 2H), 3.82 (t, *J* = 5.6 Hz, 2H), 3.74 (s, 3H), 2.37 (s, 3H). <sup>13</sup>C NMR (101 MHz, DMSO-*d*<sub>6</sub>) δ<sub>C</sub> 159.02, 144.69, 136.61, 136.42, 133.25, 130.04, 128.57, 128.01, 127.66, 113.96, 58.69, 57.14, 55.54, 21.51. HRMS (ESI-Q-TOF, m/z) calcd for C<sub>18</sub>H<sub>20</sub>O<sub>4</sub>S [M + Na]<sup>+</sup>: 355.0971, found [M + Na]<sup>+</sup>: 355.0980.

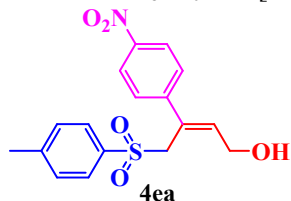

**4ea** (Z)-3-(4-nitrophenyl)-4-tosylbut-2-en-1-ol (4ea)

Yield: 65% (62 mg), white solid, m.p.:134.4-135.8 °C. <sup>1</sup>H NMR (400 MHz, DMSO-*d*<sub>6</sub>) δ<sub>H</sub> 8.09 (d, *J* = 8.0 Hz, 2H), 7.71-7.55 (m, 4H), 7.34 (d, *J* = 7.4 Hz, 2H), 6.26 (t, *J* = 6.0 Hz, 1H), 4.90 (t, *J* = 5.3 Hz, 1H), 4.69 (s, 2H), 3.92 (t, *J* = 5.6 Hz, 2H), 2.34 (s, 3H). <sup>13</sup>C NMR (101 MHz, DMSO-*d*<sub>6</sub>) δ<sub>C</sub> 147.61, 146.69, 145.01, 142.38, 136.03, 130.12, 128.67, 128.13, 126.9, 123.70, 58.84, 56.63, 21.45. HRMS (ESI-Q-TOF, m/z) calcd for C<sub>17</sub>H<sub>17</sub>NO<sub>5</sub>S [M + Na]<sup>+</sup>: 370.0763, found [M + Na]<sup>+</sup>: 370.0725.

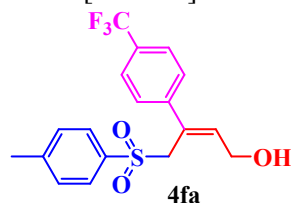

**4fa** (Z)-4-tosyl-3-(4-(trifluoromethyl)phenyl)but-2-en-1-ol (4fa)

Yield: 60% (73 mg), white solid, m.p.:123.7-124.5 °C. <sup>1</sup>H NMR (400 MHz, DMSO-*d*<sub>6</sub>) δ<sub>H</sub> 7.67-7.48 (m, 6H), 7.30 (d, *J* = 8.1 Hz, 2H), 6.16 (t, *J* = 6.0 Hz, 1H), 4.86 (t, *J* = 5.3 Hz, 1H), 4.65 (s, 2H), 3.92 (t, *J* = 5.7 Hz, 2H), 2.33 (s, 3H). <sup>13</sup>C NMR (101 MHz, DMSO-*d*<sub>6</sub>) δ<sub>C</sub> 144.92, 144.8, 140.88, 136.09, 130.02, 128.64, 127.67, 127.31, 125.38, 125.34, 58.78, 56.79, 21.39. HRMS (ESI-Q-TOF, m/z) calcd for C<sub>18</sub>H<sub>17</sub>F<sub>3</sub>O<sub>3</sub>S [M + Na]<sup>+</sup>: 393.0712, found [M + Na]<sup>+</sup>: 393.0748.

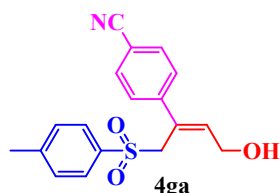

**(Z)-4-(4-hydroxy-1-tosylbut-2-en-2-yl)benzonitrile (4ga)**

Yield: 70% (75 mg), white solid, m.p.:135.2-137.0 °C.  $^1\text{H}$  NMR (400 MHz,  $\text{DMSO-}d_6$ )  $\delta_H$  7.71 (d,  $J = 8.4$  Hz, 2H), 7.61 (d,  $J = 8.2$  Hz, 2H), 7.57 (d,  $J = 8.4$  Hz, 2H), 7.34 (d,  $J = 8.1$  Hz, 2H), 6.19 (t,  $J = 6.0$  Hz, 1H), 4.86 (t,  $J = 5.3$  Hz, 1H), 4.65 (s, 2H), 3.89 (t,  $J = 5.7$  Hz, 2H), 2.37 (s, 3H).  $^{13}\text{C}$  NMR (101 MHz,  $\text{DMSO-}d_6$ )  $\delta_C$  145.56, 144.95, 141.62, 136.05, 132.50, 130.10, 128.66, 127.81, 127.17, 119.27, 110.02, 58.79, 56.54, 21.49. HRMS (ESI-Q-TOF,  $m/z$ ) calcd for  $\text{C}_{18}\text{H}_{17}\text{NO}_3\text{S}$   $[\text{M} + \text{Na}]^+$ : 350.0886, found  $[\text{M} + \text{Na}]^+$ : 350.0827.

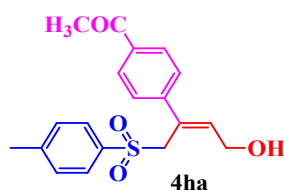

**(Z)-1-(4-(4-hydroxy-1-tosylbut-2-en-2-yl)phenyl)ethan-1-one (4ha)**

Yield:73% (80 mg), white solid, m.p.:108.4-109.7 °C.  $^1\text{H}$  NMR (400 MHz,  $\text{DMSO-}d_6$ )  $\delta_H$  7.83 (d,  $J = 8.3$  Hz, 2H), 7.62 (d,  $J = 7.8$  Hz, 2H), 7.52 (d,  $J = 8.4$  Hz, 2H), 7.34 (d,  $J = 8.1$  Hz, 2H), 6.18 (t,  $J = 6.0$  Hz, 1H), 4.84 (t,  $J = 5.3$  Hz, 1H), 4.63 (s, 2H), 3.88 (t,  $J = 5.6$  Hz, 2H), 2.57 (s, 3H), 2.35 (s, 3H).  $^{13}\text{C}$  NMR (101 MHz,  $\text{DMSO-}d_6$ )  $\delta_C$  197.86, 145.44, 144.88, 140.61, 136.16, 135.83, 132.00, 131.90, 130.09, 129.29, 129.17, 128.63, 128.56, 127.09, 58.78, 56.75, 27.17, 21.48. HRMS (ESI-Q-TOF,  $m/z$ ) calcd for  $\text{C}_{19}\text{H}_{20}\text{O}_4\text{S}$   $[\text{M} + \text{Na}]^+$ : 367.0934, found  $[\text{M} + \text{Na}]^+$ : 367.0980.

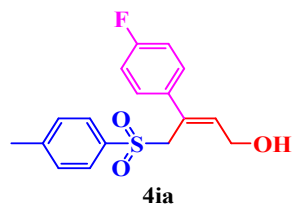

**(Z)-3-(4-fluorophenyl)-4-tosylbut-2-en-1-ol (4ia)**

Yield: 79% (64 mg), white solid, m.p.:114.2-116.5 °C.  $^1\text{H}$  NMR (400 MHz,  $\text{DMSO-}d_6$ )  $\delta_H$  7.62 (d,  $J = 7.9$  Hz, 2H), 7.46-7.30 (m, 4H), 7.07 (t,  $J = 8.7$  Hz, 2H), 6.01 (t,  $J = 6.1$  Hz, 1H), 4.77 (t,  $J = 5.2$  Hz, 1H), 4.57 (s, 2H), 3.84 (t,  $J = 5.6$  Hz, 2H), 2.37 (s, 3H).  $^{13}\text{C}$  NMR (101 MHz,  $\text{DMSO-}d_6$ )  $\delta_C$  144.80, 138.59, 137.41, 136.28, 130.05, 128.93, 128.85, 128.60, 127.29, 58.69, 57.13, 21.50. HRMS (ESI-Q-TOF,  $m/z$ ) calcd for  $\text{C}_{17}\text{H}_{17}\text{FO}_3\text{S}$   $[\text{M} + \text{Na}]^+$ : 343.0717, found  $[\text{M} + \text{Na}]^+$ : 343.0780.

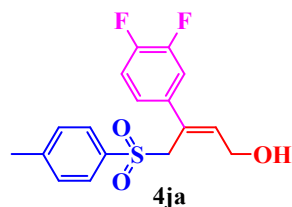

**(Z)-3-(3,4-difluorophenyl)-4-tosylbut-2-en-1-ol (4ja)**

Yield: 68% (75 mg), white solid, m.p.:67.9-68.0 °C.  $^1\text{H}$  NMR (400 MHz,  $\text{DMSO-}d_6$ )  $\delta_H$  7.61 (d,  $J = 8.2$  Hz, 2H), 7.44 (ddd,  $J = 12.5, 7.8, 2.2$  Hz, 1H), 7.35 (d,  $J = 8.0$  Hz, 2H), 7.28 (dd,  $J = 10.5, 8.6$  Hz, 1H), 7.20 (d,  $J = 8.0$  Hz, 1H), 6.09 (t,  $J = 6.1$  Hz, 1H), 4.81 (t,  $J = 5.3$  Hz, 1H), 4.60 (s, 2H), 3.87 (t,  $J = 5.7$  Hz, 2H), 2.37 (s, 3H).  $^{13}\text{C}$  NMR (101 MHz,  $\text{DMSO-}d_6$ )  $\delta_C$  144.86, 139.75, 138.60, 136.16, 130.02, 128.67, 126.52, 123.80, 117.56, 117.39, 116.11, 115.93, 58.68, 56.82, 21.46. HRMS (ESI-Q-TOF,  $m/z$ ) calcd for  $\text{C}_{17}\text{H}_{16}\text{F}_2\text{O}_3\text{S}$   $[\text{M} + \text{Na}]^+$ : 361.0656, found  $[\text{M} + \text{Na}]^+$ : 361.0656.

Na]<sup>+</sup>: 361.0686.

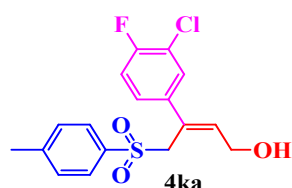

**(Z)-3-(3-chloro-4-fluorophenyl)-4-tosylbut-2-en-1-ol (4ka)**

Yield: 65% (75 mg), white solid, m.p.: 60.4-65.2 °C. <sup>1</sup>H NMR (400 MHz, DMSO-*d*<sub>6</sub>)  $\delta_H$  7.59 (d, *J* = 8.1 Hz, 2H), 7.50-7.43 (m, 1H), 7.31 (m, 4H), 6.06 (t, *J* = 6.0 Hz, 1H), 4.61 (s, 2H), 3.88 (d, *J* = 6.0 Hz, 2H), 2.36 (s, 3H). <sup>13</sup>C NMR (101 MHz, DMSO-*d*<sub>6</sub>)  $\delta_C$  144.86, 139.85, 138.73, 136.14, 130.00, 129.01, 128.63, 127.66, 126.46, 119.68, 116.97, 116.76, 58.69, 56.87, 21.49. HRMS (ESI-Q-TOF, *m/z*) calcd for C<sub>17</sub>H<sub>16</sub>ClFO<sub>3</sub>S [M + Na]<sup>+</sup>: 377.0355, found [M + Na]<sup>+</sup>: 377.0390.

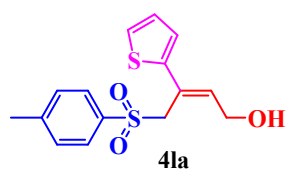

**(E)-3-(thiophen-2-yl)-4-tosylbut-2-en-1-ol (4la)**

Yield: 80% (81 mg), white solid, m.p.: 113.6-114.8 °C. <sup>1</sup>H NMR (400 MHz, DMSO-*d*<sub>6</sub>)  $\delta_H$  7.69 (d, *J* = 8.2 Hz, 2H), 7.39 (d, *J* = 8.1 Hz, 2H), 7.34 (d, *J* = 5.1 Hz, 1H), 7.10 (d, *J* = 3.4 Hz, 1H), 6.91 (dd, *J* = 5.0, 3.7 Hz, 1H), 6.15 (t, *J* = 6.3 Hz, 1H), 4.78 (t, *J* = 5.3 Hz, 1H), 4.54 (s, 2H), 3.86 (t, *J* = 5.6 Hz, 2H), 2.38 (s, 3H). <sup>13</sup>C NMR (101 MHz, DMSO-*d*<sub>6</sub>)  $\delta_C$  144.93, 144.28, 136.39, 136.17, 130.12, 128.68, 128.06, 125.70, 125.30, 122.25, 58.35, 57.01, 21.54. HRMS (ESI-Q-TOF, *m/z*) calcd for C<sub>15</sub>H<sub>16</sub>O<sub>3</sub>S<sub>2</sub> [M + Na]<sup>+</sup>: 331.0486, found [M + Na]<sup>+</sup>: 331.0439.

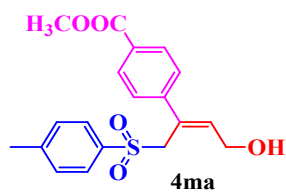

**(Z)-3-(4-methoxycarbonylphenyl)-4-tosylbut-2-en-1-ol (4ma)**

Yield: 62% (73 mg), white solid, m.p.: 83.5-85.7 °C. <sup>1</sup>H NMR (400 MHz, DMSO-*d*<sub>6</sub>)  $\delta_H$  7.82 (d, *J* = 8.4 Hz, 2H), 7.62 (d, *J* = 8.4 Hz, 2H), 7.51 (d, *J* = 8.4 Hz, 2H), 7.33 (d, *J* = 8.1 Hz, 2H), 6.18 (t, *J* = 6.1 Hz, 1H), 4.85 (t, *J* = 5.3 Hz, 1H), 4.63 (s, 2H), 3.89 (t, *J* = 5.7 Hz, 2H), 3.85 (s, 3H), 2.34 (s, 3H). <sup>13</sup>C NMR (101 MHz, DMSO-*d*<sub>6</sub>)  $\delta_C$  145.56, 144.88, 140.74, 136.15, 132.00, 131.90, 130.08, 129.45, 129.29, 129.17, 128.64, 128.54, 127.49, 127.17, 58.79, 56.75, 52.56, 21.46. HRMS (ESI-Q-TOF, *m/z*) calcd for C<sub>19</sub>H<sub>20</sub>O<sub>5</sub>S [M + Na]<sup>+</sup>: 383.0975, found [M + Na]<sup>+</sup>: 383.0929.

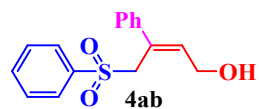

**(Z)-3-phenyl-4-(phenylsulfonyl)but-2-en-1-ol (4ab)**

Yield: 65% (64 mg), white solid, m.p.: 68.6-69.7 °C. <sup>1</sup>H NMR (400 MHz, DMSO-*d*<sub>6</sub>)  $\delta_H$  7.76 (d, *J* = 7.3 Hz, 2H), 7.66 (d, *J* = 7.5 Hz, 1H), 7.55 (t, *J* = 7.7 Hz, 2H), 7.37 (d, *J* = 6.9 Hz, 2H), 7.23 (dt, *J* = 6.8, 4.7 Hz, 3H), 6.05 (t, *J* = 6.2 Hz, 1H), 4.76 (t, *J* = 5.4 Hz, 1H), 4.61 (s, 2H), 3.85 (t, *J* = 5.8 Hz, 2H). <sup>13</sup>C NMR (101 MHz, DMSO-*d*<sub>6</sub>)  $\delta_C$  140.89, 139.18, 138.73, 134.25, 129.63, 128.61, 128.56, 128.03, 127.67, 126.79, 58.73, 56.94. HRMS (ESI-Q-TOF, *m/z*) calcd for C<sub>16</sub>H<sub>16</sub>O<sub>3</sub>S [M + Na]<sup>+</sup>: 311.0742, found [M + Na]<sup>+</sup>: 311.0718.

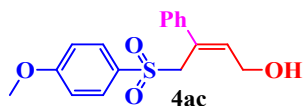

**(Z)-4-((4-methoxyphenyl)sulfonyl)-3-phenylbut-2-en-1-ol (4ac)**

Yield: 81% (80 mg), white solid, m.p.: 81.3-83.2 °C. <sup>1</sup>H NMR (400 MHz, DMSO-*d*<sub>6</sub>) δ<sub>H</sub> 7.65 (d, *J* = 8.9 Hz, 2H), 7.36 (d, *J* = 6.9 Hz, 2H), 7.30-7.14 (m, 3H), 7.04 (d, *J* = 8.9 Hz, 2H), 6.03 (t, *J* = 6.1 Hz, 1H), 4.76 (t, *J* = 5.3 Hz, 1H), 4.54 (s, 2H), 3.85 (d, *J* = 5.7 Hz, 2H), 3.82 (s, 3H). <sup>13</sup>C NMR (101 MHz, DMSO-*d*<sub>6</sub>) δ<sub>C</sub> 163.72, 140.97, 138.43, 130.83, 130.66, 128.59, 128.37, 127.59, 126.80, 114.80, 58.74, 57.28, 56.23. HRMS (ESI-Q-TOF, *m/z*) calcd for C<sub>17</sub>H<sub>18</sub>O<sub>4</sub>S [M + Na]<sup>+</sup>: 341.0846, found [M + Na]<sup>+</sup>: 341.0823.

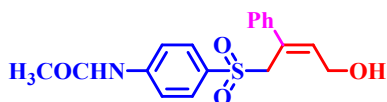

4ad

**(Z)-N-(4-((4-hydroxy-2-phenylbut-2-en-1-yl)sulfonyl)phenyl)acetamide (4ad)**

Yield: 79% (78 mg), yellow oil. <sup>1</sup>H NMR (400 MHz, DMSO-*d*<sub>6</sub>) δ<sub>H</sub> 10.36 (s, 1H), 7.69 (m, 4H), 7.39 (d, *J* = 7.2 Hz, 2H), 7.31-7.05 (m, 3H), 6.04 (t, *J* = 6.1 Hz, 1H), 4.74 (s, 1H), 4.53 (s, 2H), 3.82 (s, 2H), 2.09 (s, 3H). <sup>13</sup>C NMR (101 MHz, DMSO-*d*<sub>6</sub>) δ<sub>C</sub> 199.62, 169.59, 144.47, 141.01, 138.46, 132.58, 129.82, 128.60, 128.26, 127.62, 126.83, 118.82, 58.72, 57.27, 24.66. HRMS (ESI-Q-TOF, *m/z*) calcd for C<sub>18</sub>H<sub>19</sub>NO<sub>4</sub>S [M + Na]<sup>+</sup>: 368.0955, found [M + Na]<sup>+</sup>: 368.0927.

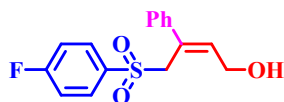

4ae

**(Z)-4-((4-fluorophenyl)sulfonyl)-3-phenylbut-2-en-1-ol (4ae)**

Yield: 78% (77 mg), white solid, m.p.: 86.0-87.1 °C. <sup>1</sup>H NMR (400 MHz, DMSO-*d*<sub>6</sub>) δ<sub>H</sub> 7.83-7.74 (m, 2H), 7.35 (t, *J* = 8.9 Hz, 4H), 7.24 (m, 3H), 6.06 (t, *J* = 6.2 Hz, 1H), 4.79 (s, 1H), 4.64 (s, 2H), 3.93 (d, *J* = 5.9 Hz, 2H). <sup>13</sup>C NMR (151 MHz, DMSO-*d*<sub>6</sub>) δ<sub>C</sub> 166.32, 164.64, 140.74, 138.80, 135.51, 131.87, 131.81, 128.58, 128.06, 127.64, 126.79, 116.81, 116.66, 58.82, 56.96. HRMS (ESI-Q-TOF, *m/z*) calcd for C<sub>16</sub>H<sub>15</sub>FO<sub>3</sub>S [M + Na]<sup>+</sup>: 329.0648, found [M + Na]<sup>+</sup>: 329.0618.

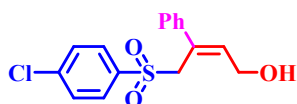

4af

**(Z)-4-((4-chlorophenyl)sulfonyl)-3-phenylbut-2-en-1-ol (4af)**

Yield: 80% (80 mg), yellow oil. <sup>1</sup>H NMR (400 MHz, DMSO-*d*<sub>6</sub>) δ<sub>H</sub> 7.73 (d, *J* = 8.6 Hz, 2H), 7.58 (d, *J* = 8.6 Hz, 2H), 7.33 (dd, *J* = 7.8, 1.6 Hz, 2H), 7.27-7.16 (m, 3H), 6.07 (t, *J* = 6.2 Hz, 1H), 4.80 (s, 1H), 4.66 (s, 2H), 3.95 (d, *J* = 5.9 Hz, 2H). <sup>13</sup>C NMR (101 MHz, DMSO-*d*<sub>6</sub>) δ<sub>C</sub> 140.71, 139.35, 138.88, 138.00, 130.58, 129.68, 128.59, 127.95, 127.63, 126.82, 58.85, 56.91. HRMS (ESI-Q-TOF, *m/z*) calcd for C<sub>16</sub>H<sub>15</sub>ClO<sub>3</sub>S [M + Na]<sup>+</sup>: 345.0377, found [M + Na]<sup>+</sup>: 345.0323.

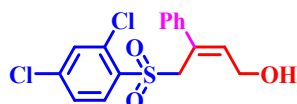

4ag

**(Z)-4-((2,4-dichlorophenyl)sulfonyl)-3-phenylbut-2-en-1-ol (4ag)**

Yield: 73% (73 mg), white solid, m.p.: 99.1-100.5 °C. <sup>1</sup>H NMR (400 MHz, DMSO-*d*<sub>6</sub>) δ<sub>H</sub> 7.78 (d, *J* = 8.5 Hz, 1H), 7.66 (d, *J* = 1.9 Hz, 1H), 7.58 (dd, *J* = 8.5, 1.9 Hz, 1H), 7.31-7.11 (m, 5H), 6.08 (t, *J* = 6.1 Hz, 1H), 4.90 (s, 1H), 4.78 (s, 2H), 4.18 (t, *J* = 5.1 Hz, 2H). <sup>13</sup>C NMR (101 MHz, DMSO-*d*<sub>6</sub>) δ<sub>C</sub> 140.71, 138.91, 138.40, 132.63, 130.62, 128.59, 128.46, 127.90, 127.61, 126.82,

58.83, 56.90. HRMS (ESI-Q-TOF, m/z) calcd for C<sub>16</sub>H<sub>14</sub>Cl<sub>2</sub>O<sub>3</sub>S [M + Na]<sup>+</sup>: 378.9963, found [M + Na]<sup>+</sup>: 378.9933.

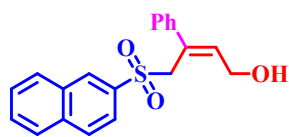

4ah

**(Z)-4-(naphthalen-2-ylsulfonyl)-3-phenylbut-2-en-1-ol (4ah)**

Yield: 85% (85 mg), yellow oil. <sup>1</sup>H NMR (400 MHz, DMSO-*d*<sub>6</sub>)  $\delta_H$  8.42 (s, 1H), 8.15 (d, *J* = 8.0 Hz, 1H), 8.05 (m, 2H), 7.82-7.63 (m, 3H), 7.37 (d, *J* = 7.4 Hz, 2H), 7.17 (t, *J* = 7.4 Hz, 2H), 7.11 (d, *J* = 7.1 Hz, 1H), 6.06 (t, *J* = 6.1 Hz, 1H), 4.74 (s, 1H), 4.68 (s, 2H), 3.90 (s, 2H). <sup>13</sup>C NMR (151 MHz, DMSO-*d*<sub>6</sub>)  $\delta_C$  140.84, 138.68, 136.46, 135.18, 132.04, 130.26, 129.90, 129.67, 128.47, 128.28, 128.06, 128.03, 127.52, 126.76, 123.40, 58.81, 57.07. HRMS (ESI-Q-TOF, m/z) calcd for C<sub>20</sub>H<sub>18</sub>O<sub>3</sub>S [M + Na]<sup>+</sup>: 361.0835, found [M + Na]<sup>+</sup>: 361.0869.

### 3 The Structural Confirmation of the representative compound 4aa

The chemical structures of the target compounds were confirmed by <sup>1</sup>H NMR, <sup>13</sup>C NMR, and MS spectra. The representative compound **4aa** was found to have the molecular formula C<sub>17</sub>H<sub>18</sub>O<sub>3</sub>S determined by mass spectroscopy. <sup>1</sup>H NMR spectroscopy showed that all the protons of **4aa** resonated with the expected chemical shifts (**Figure 2SA**), the exchangeable signal observed at  $\delta = 4.76$  was assigned to -OH (**Figure 2SB**). The results of <sup>13</sup>C NMR experiment further confirmed its chemical structure. In addition, the configuration of alkene double bond was investigated by NOESY NMR. As shown in **Figure 1SB**, an evident NOE signal was observed between protons of H<sup>1</sup> (Ts-CH<sub>2</sub>-C,  $\delta_1 = 4.53$  ppm) and H<sup>2</sup> (C-CH<sub>2</sub>-OH,  $\delta_2 = 3.82$  ppm), which existed only in the *Z* isomer due to the appropriate intramolecular H-H distance (**Figure 1A**). Thus, all the related compounds were assigned the same *Z*-configuration by analogy unambiguously.

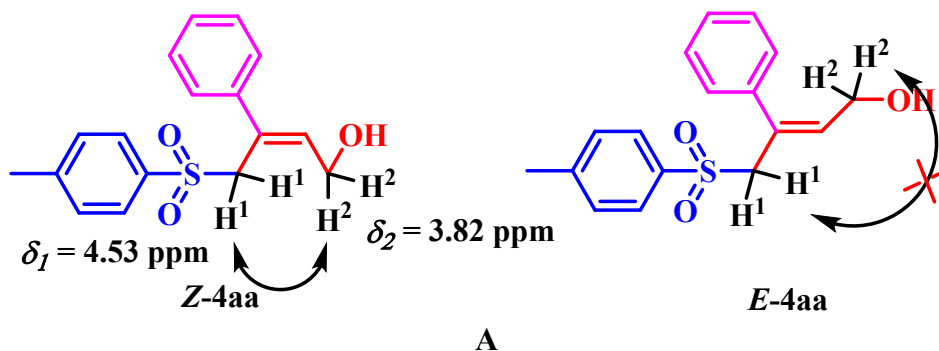



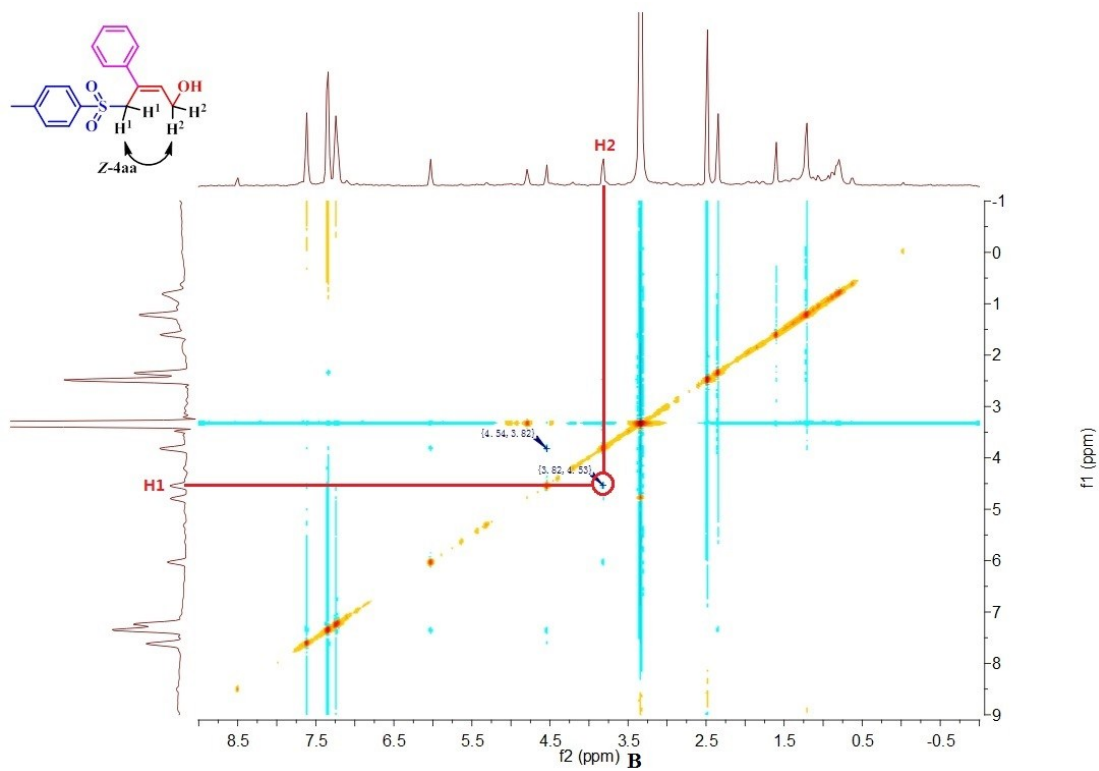

Figure.1S. The structure and NOESY NMR spectra of the representative compound **4aa**

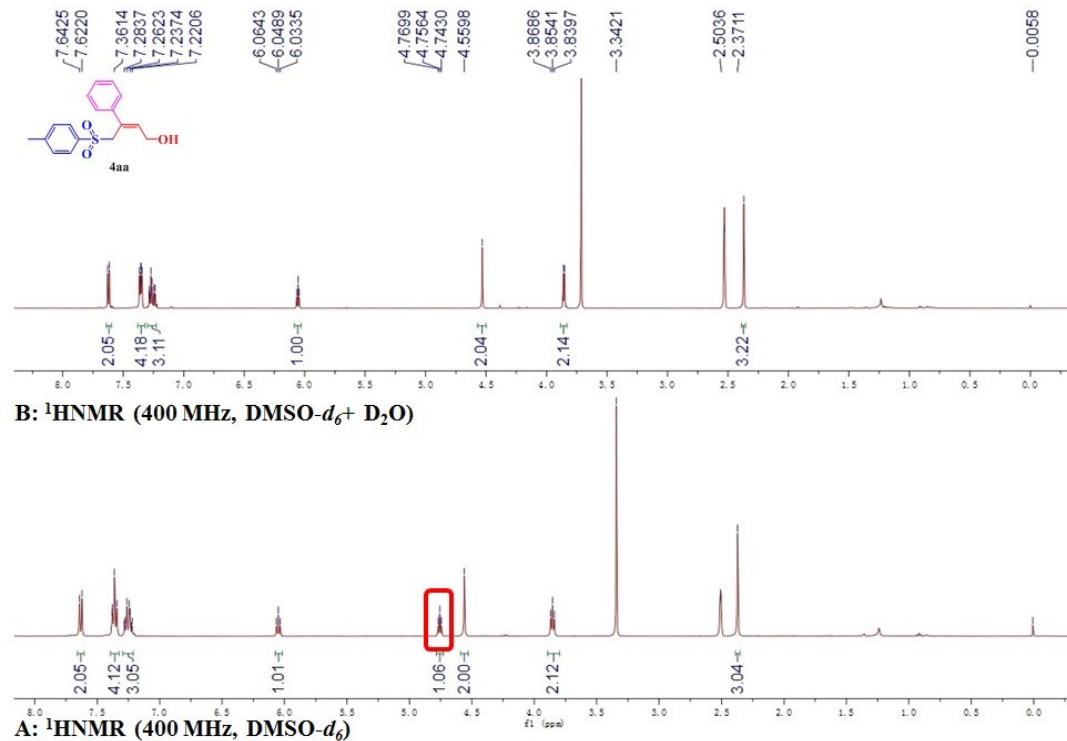

Figure.2S. The  $^1\text{H}$ NMR (A) and deuterium exchange  $^1\text{H}$ NMR (B) spectra of the representative compound **4aa**

## 4. NMR Spectra of New Compounds

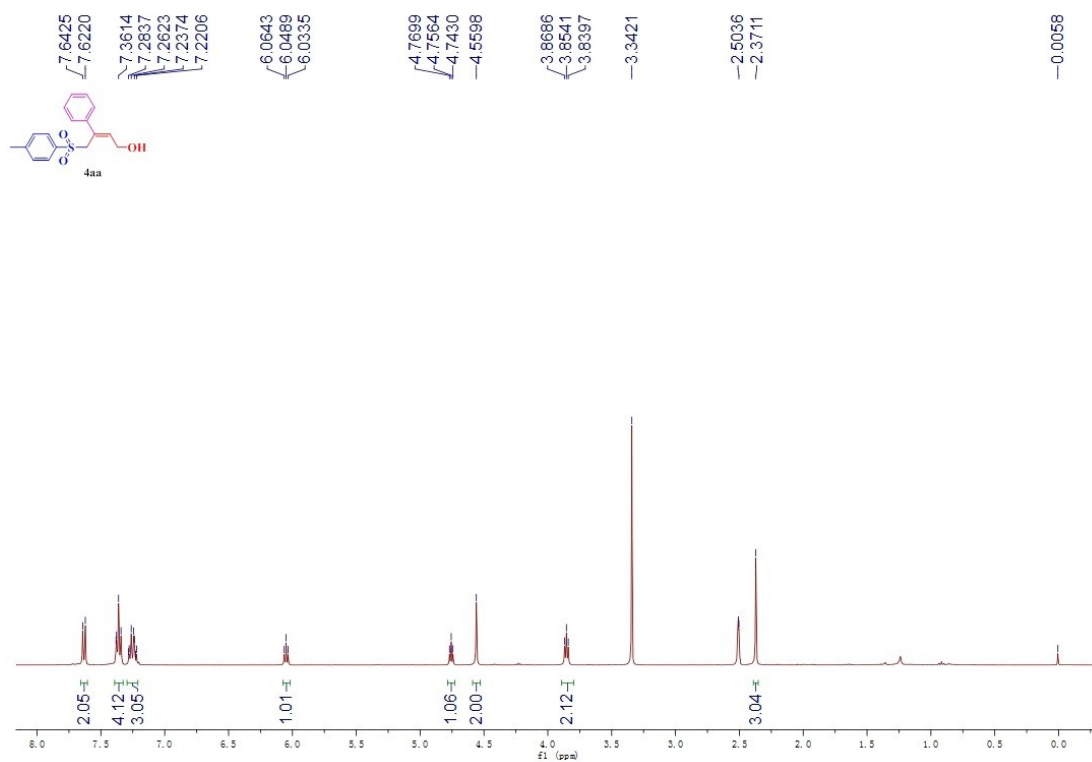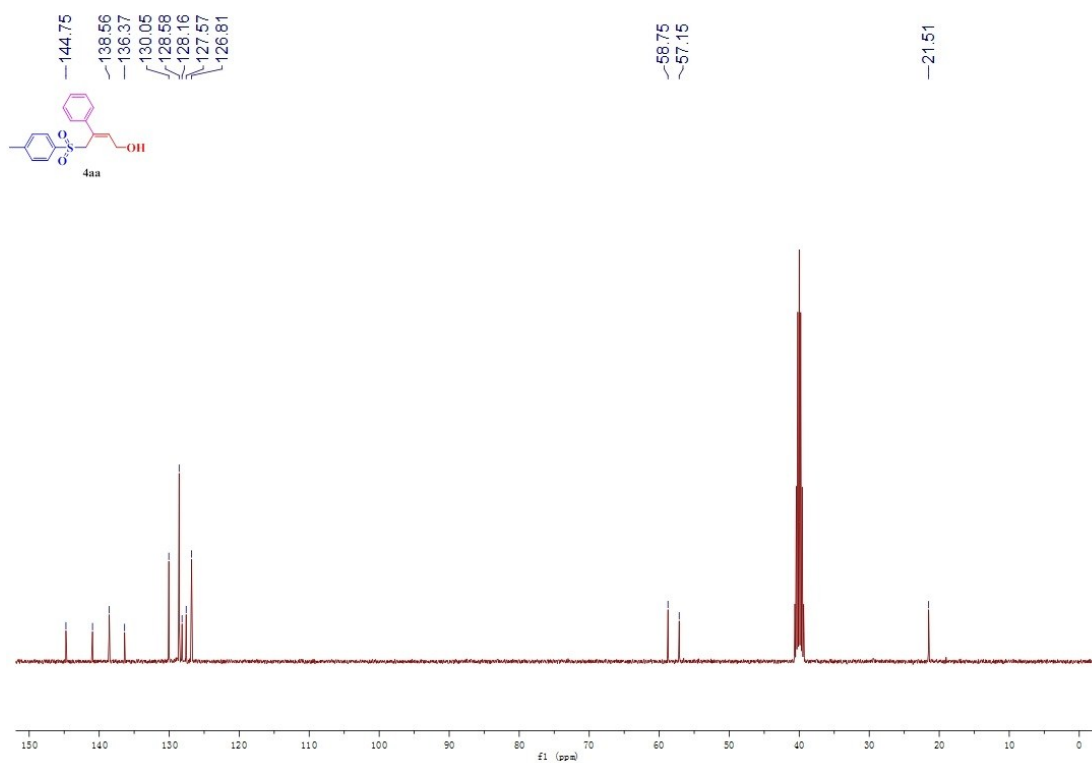

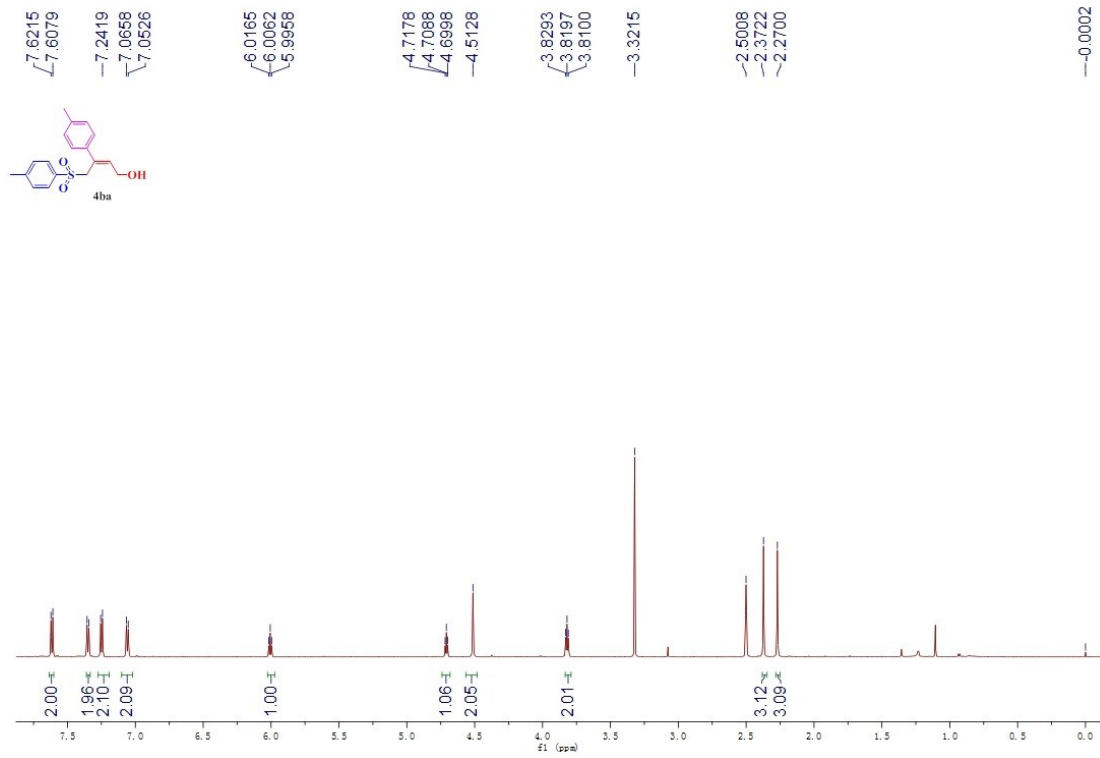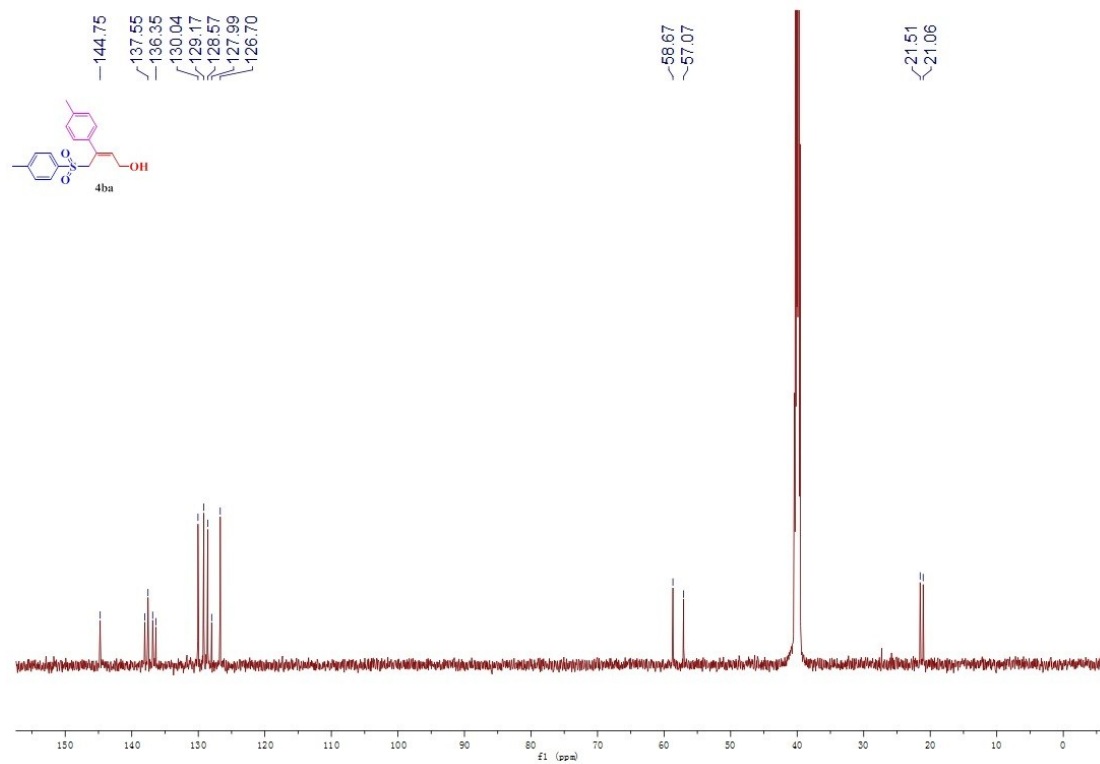

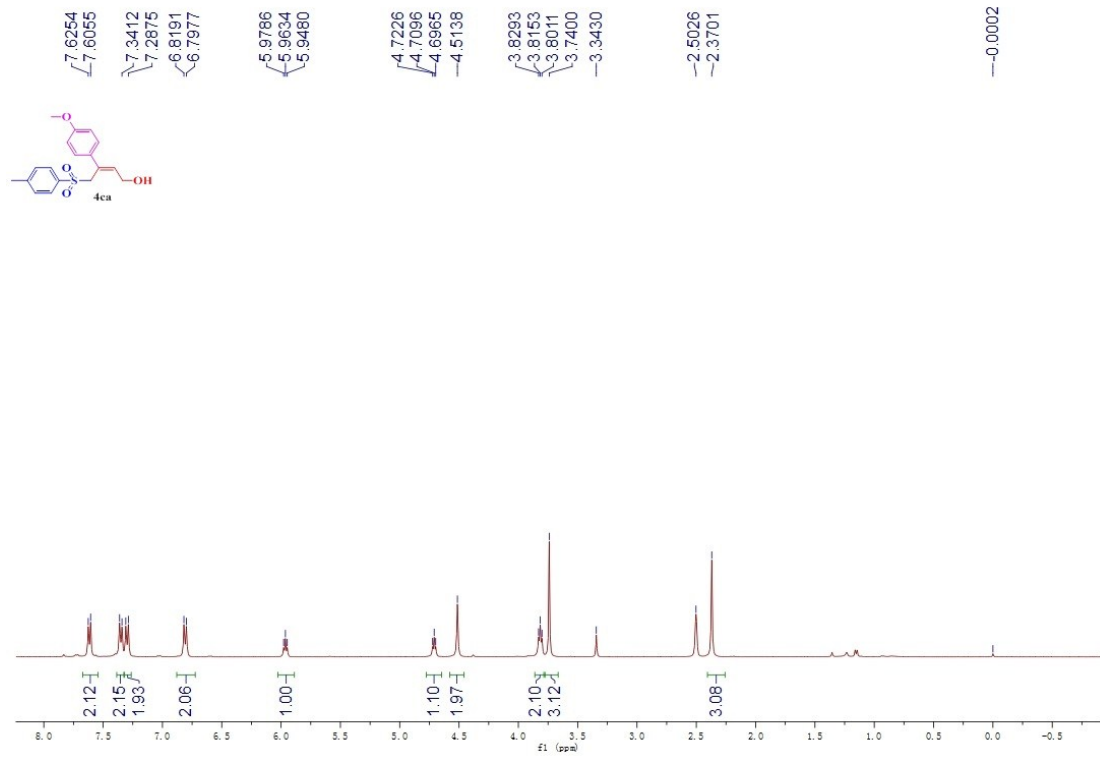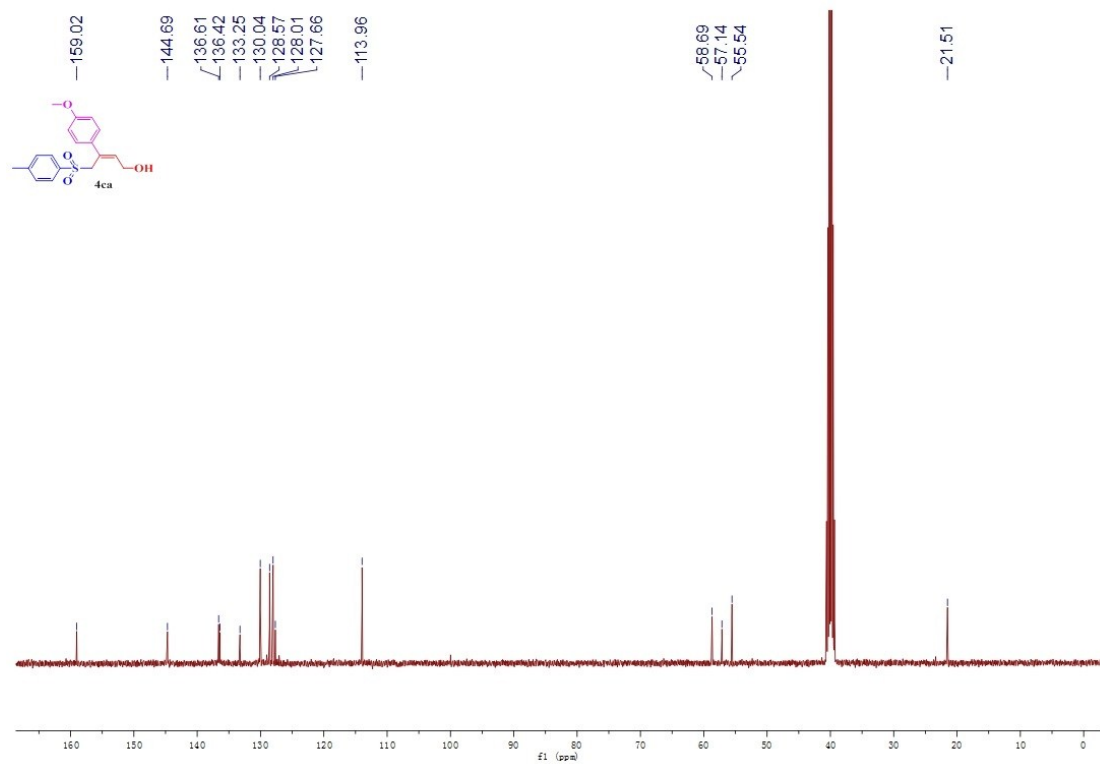

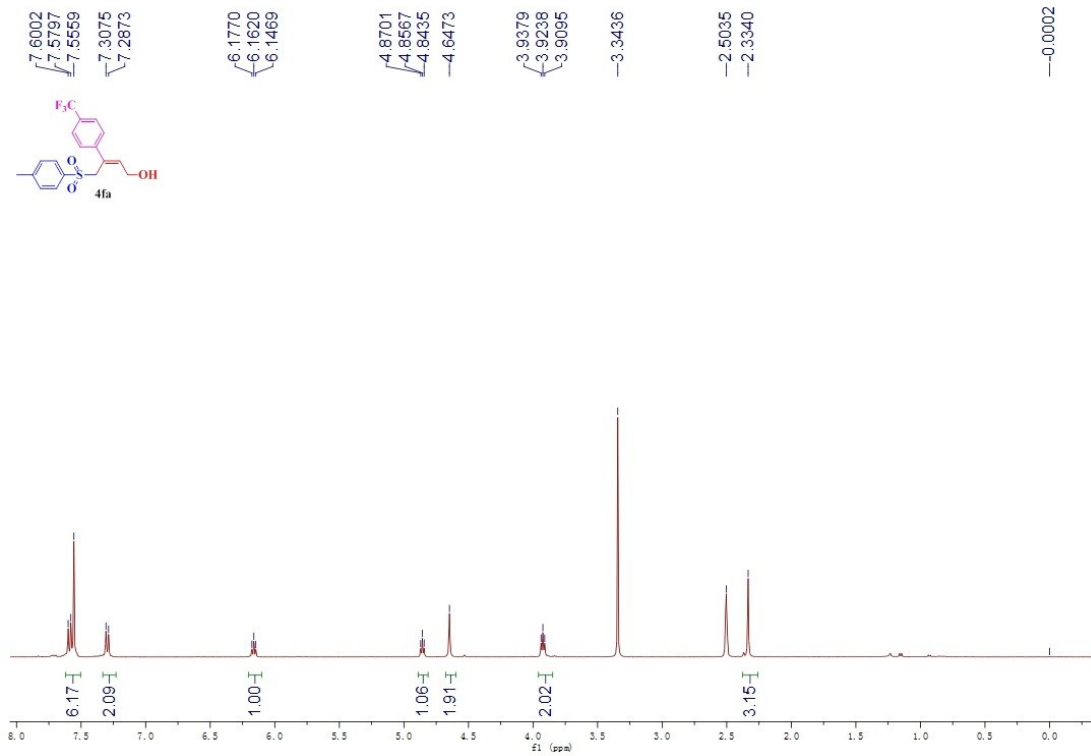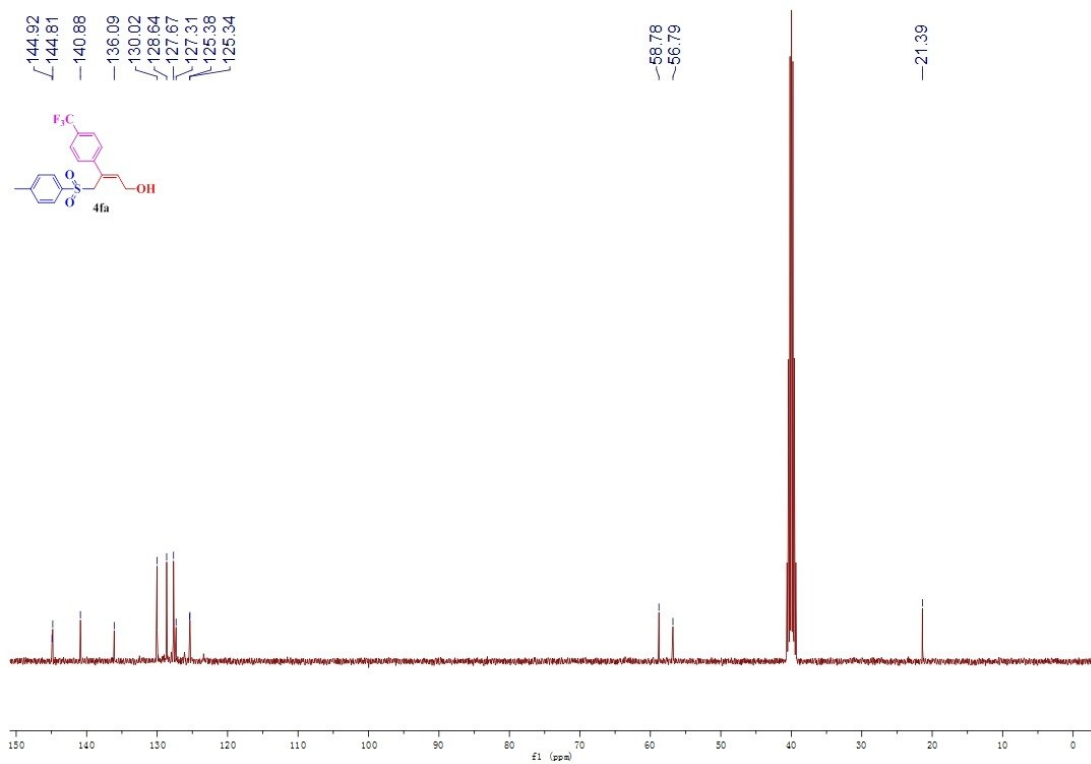

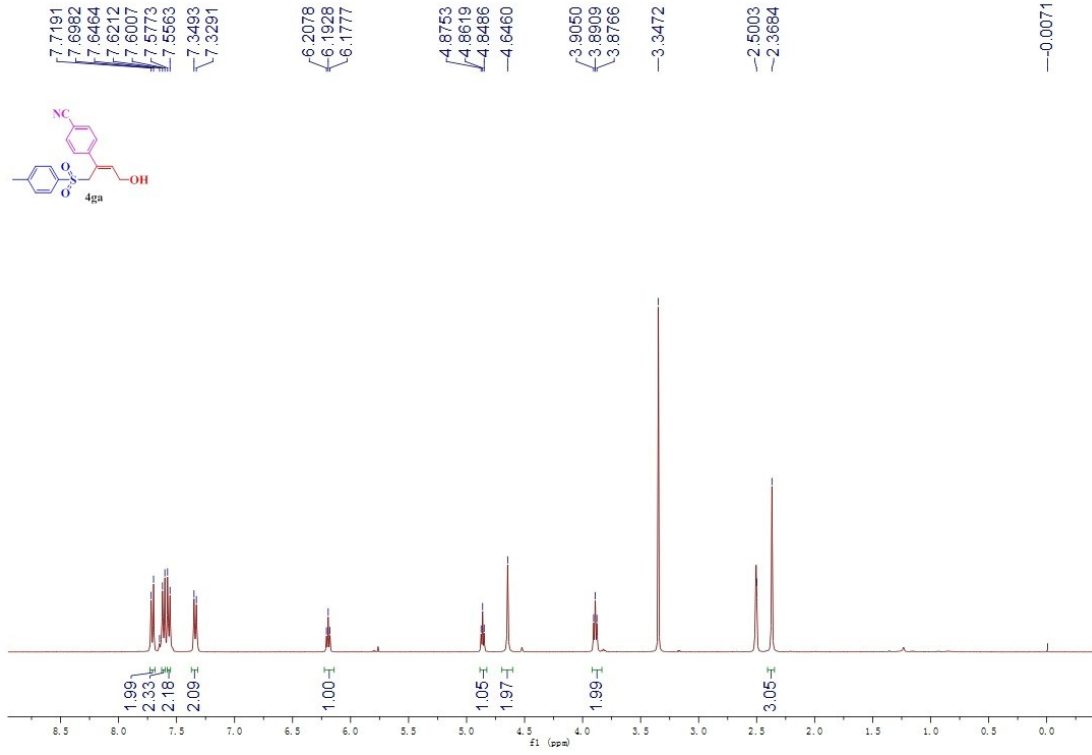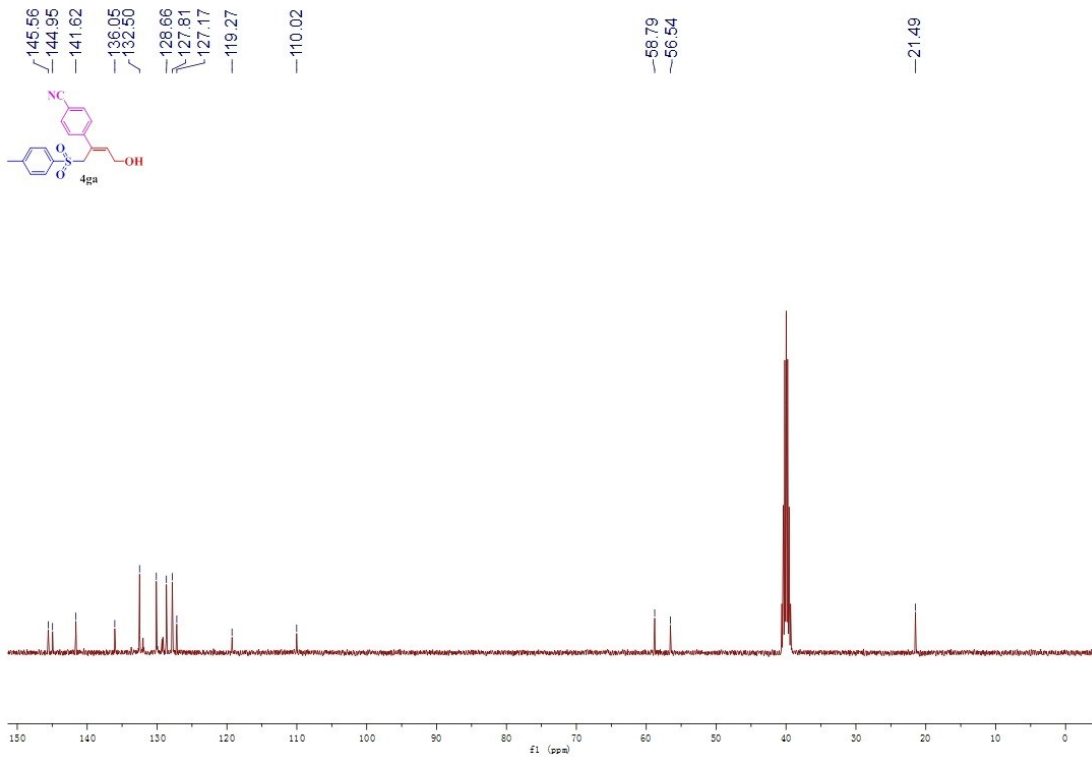

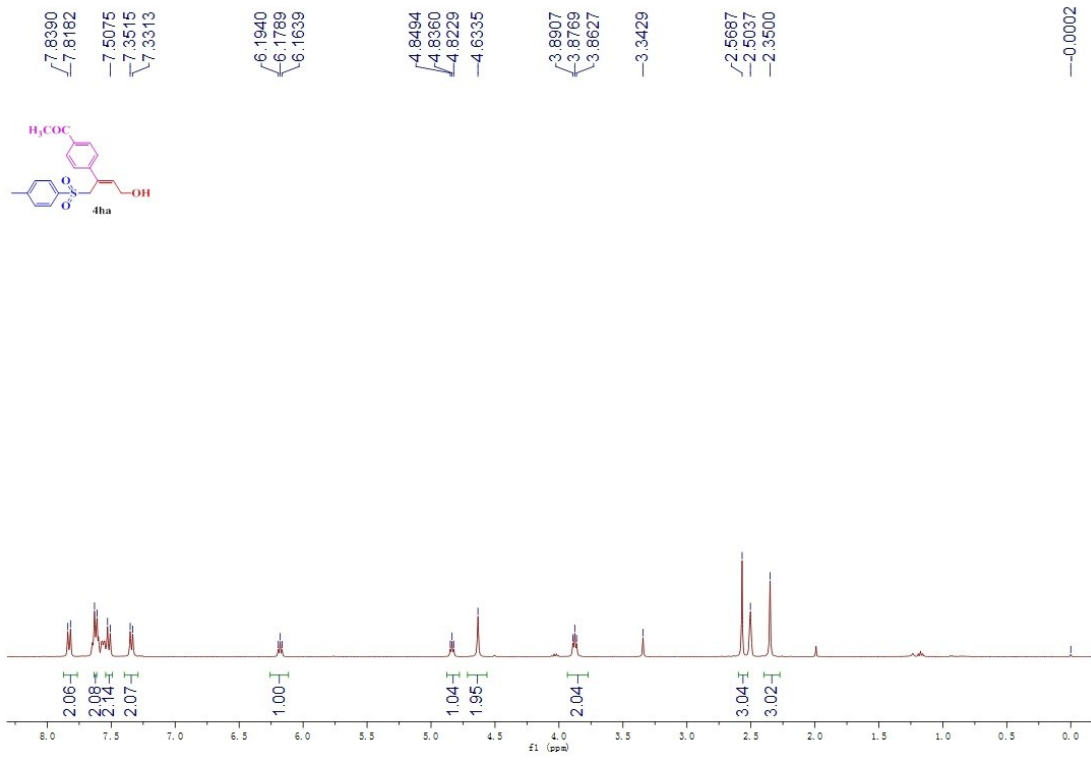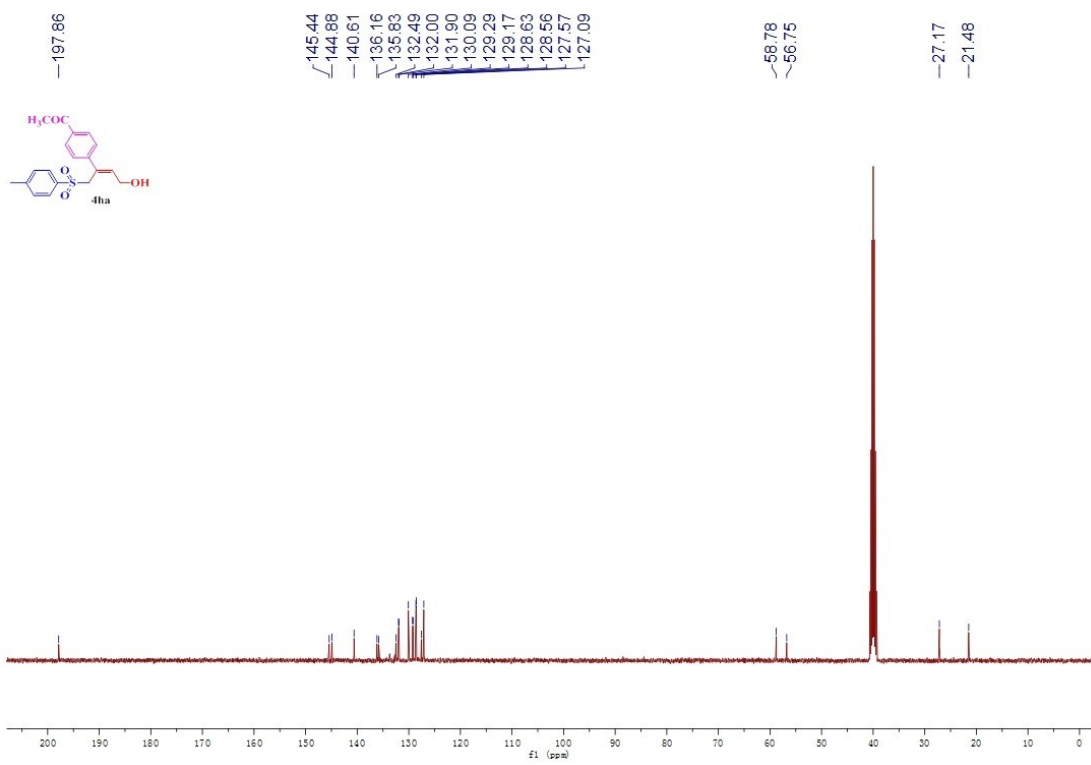

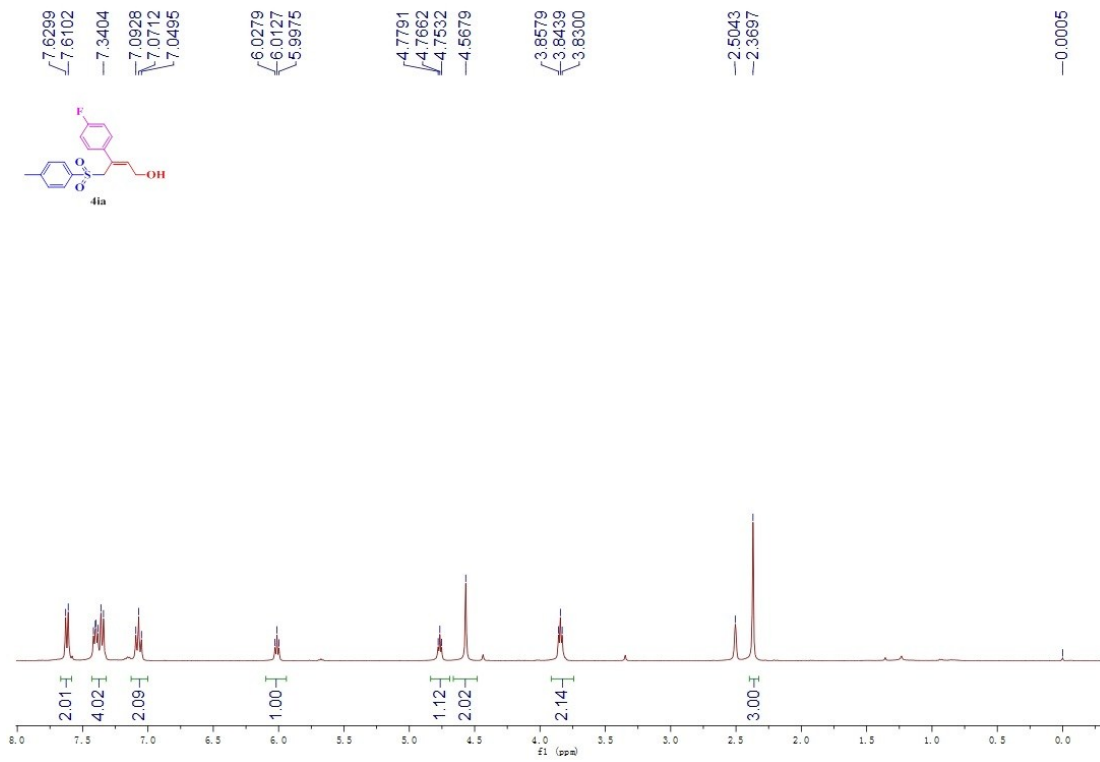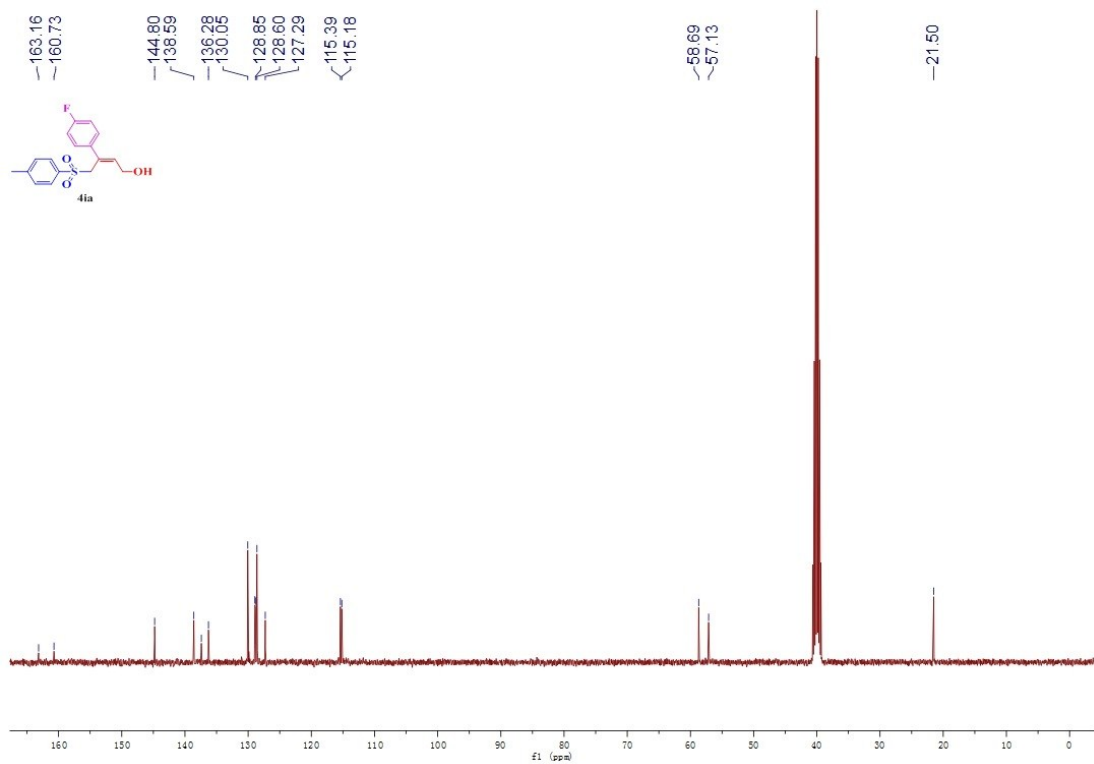



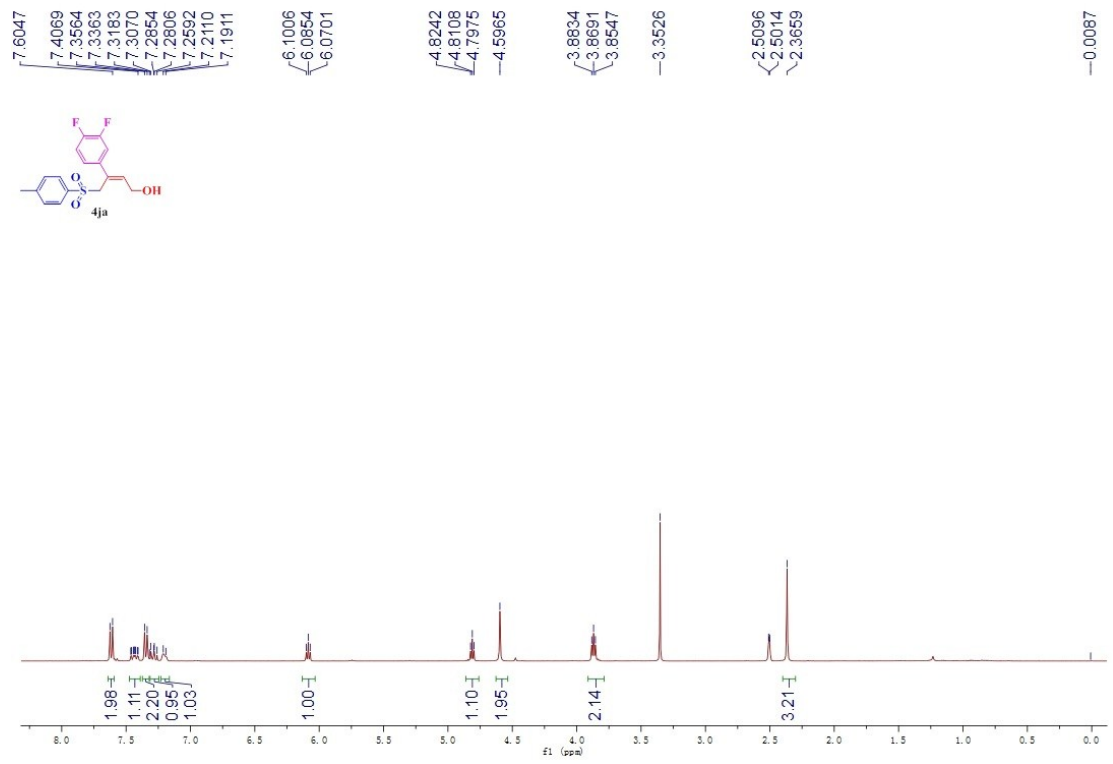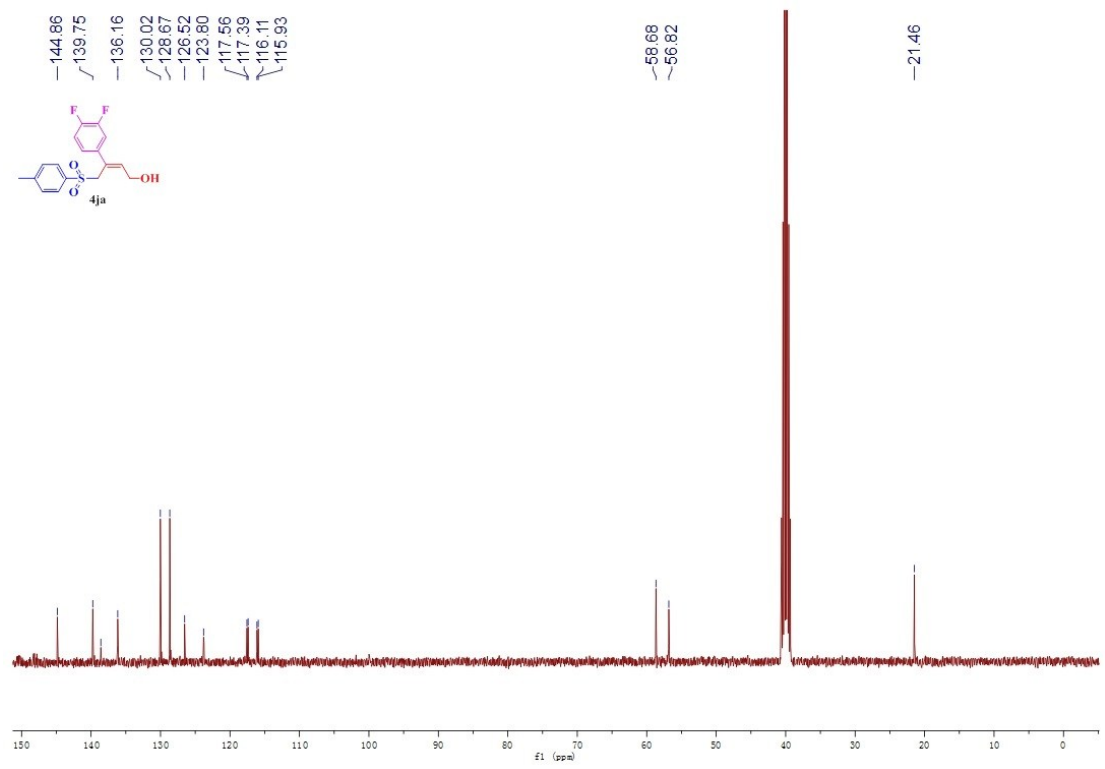

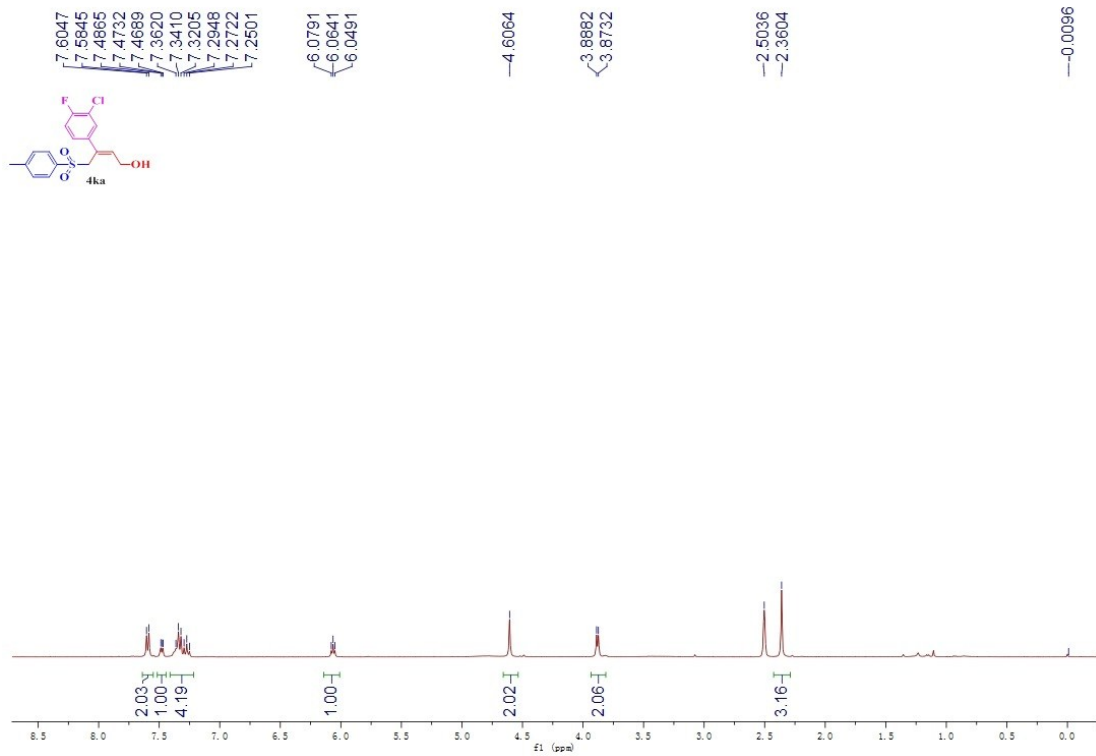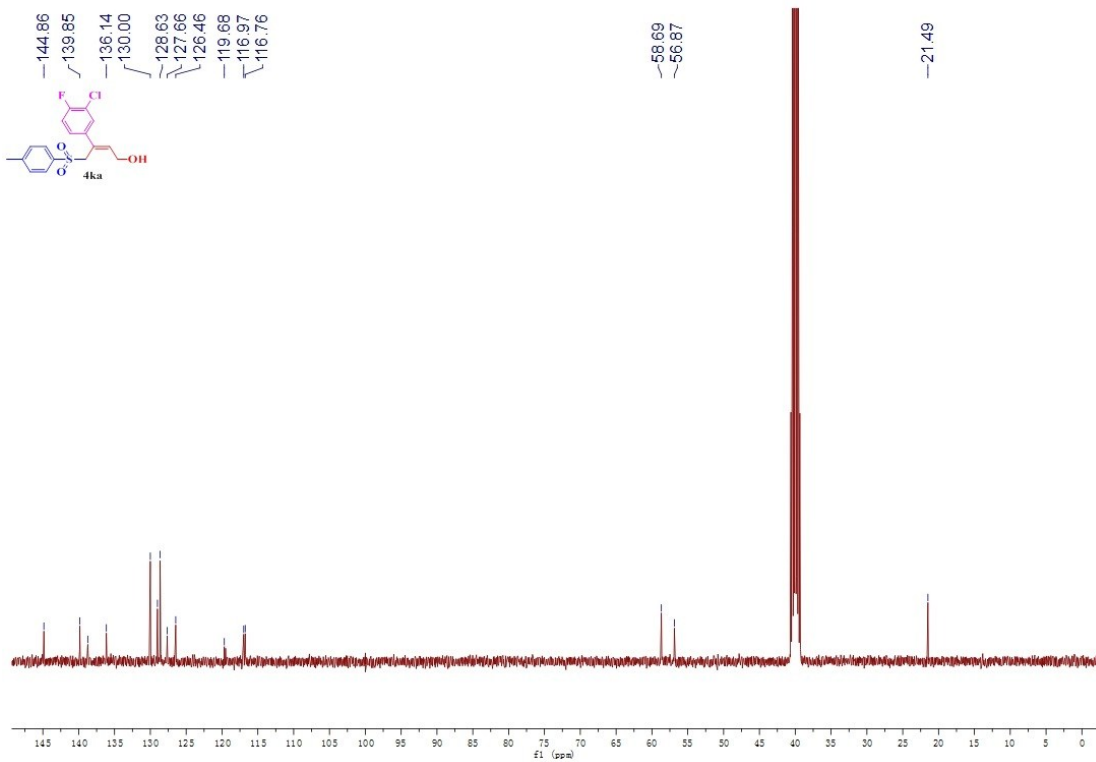

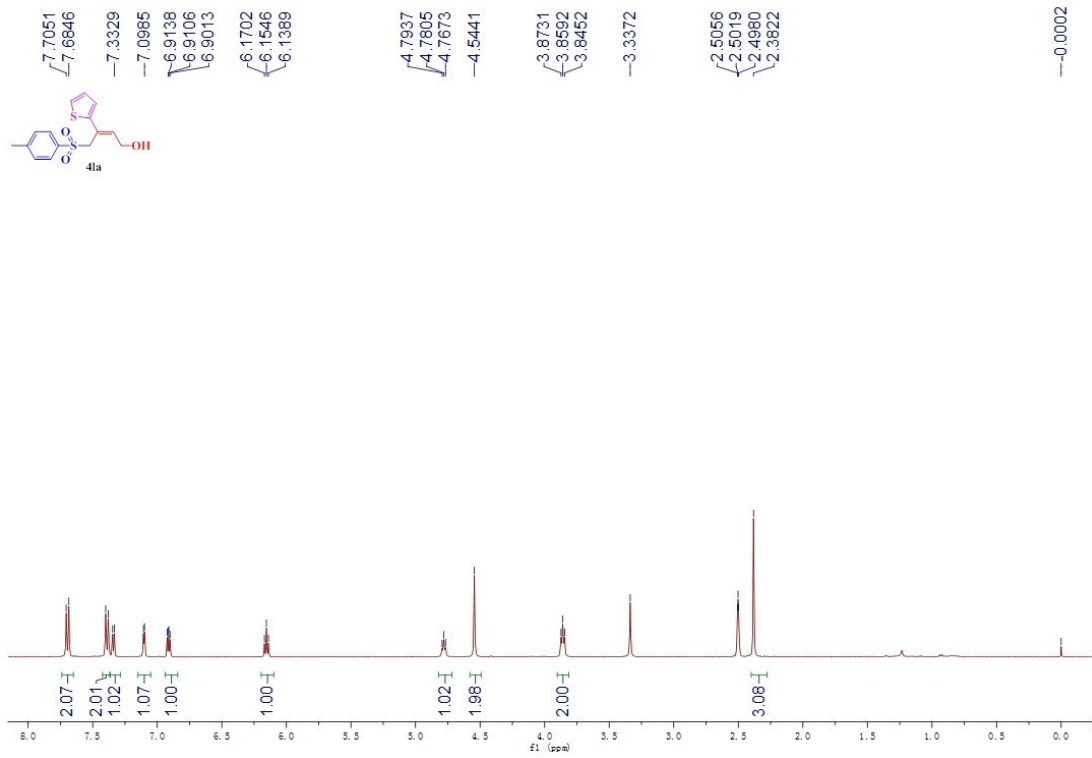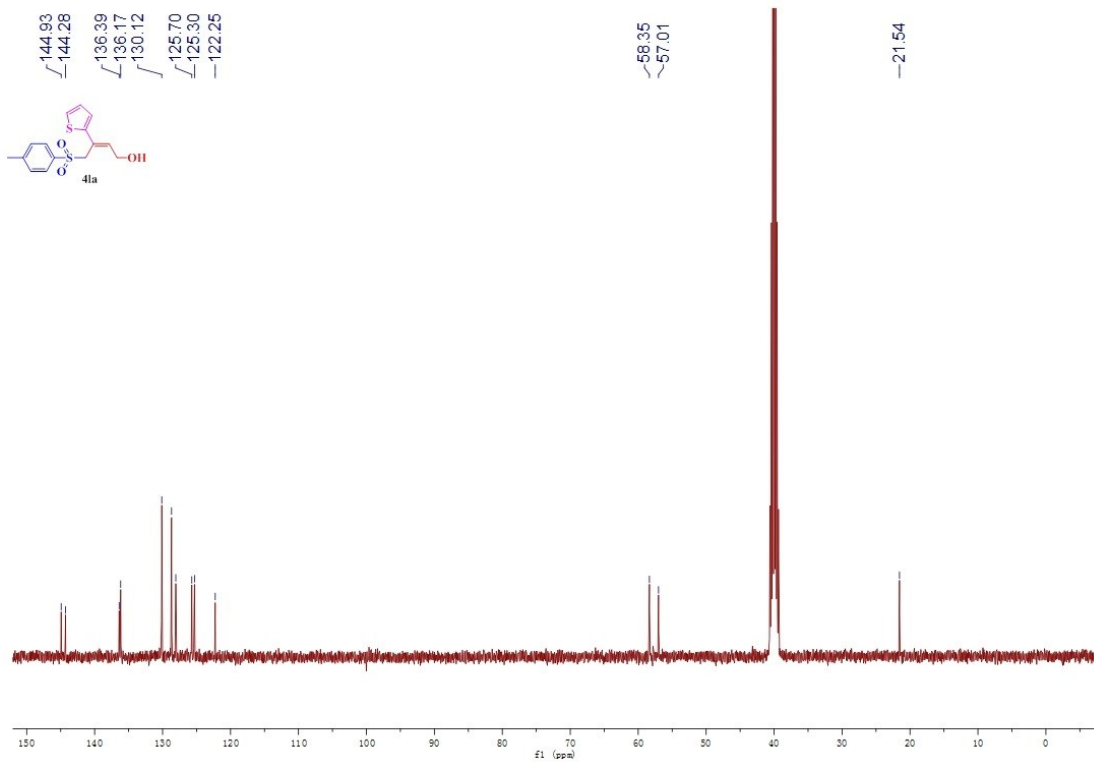

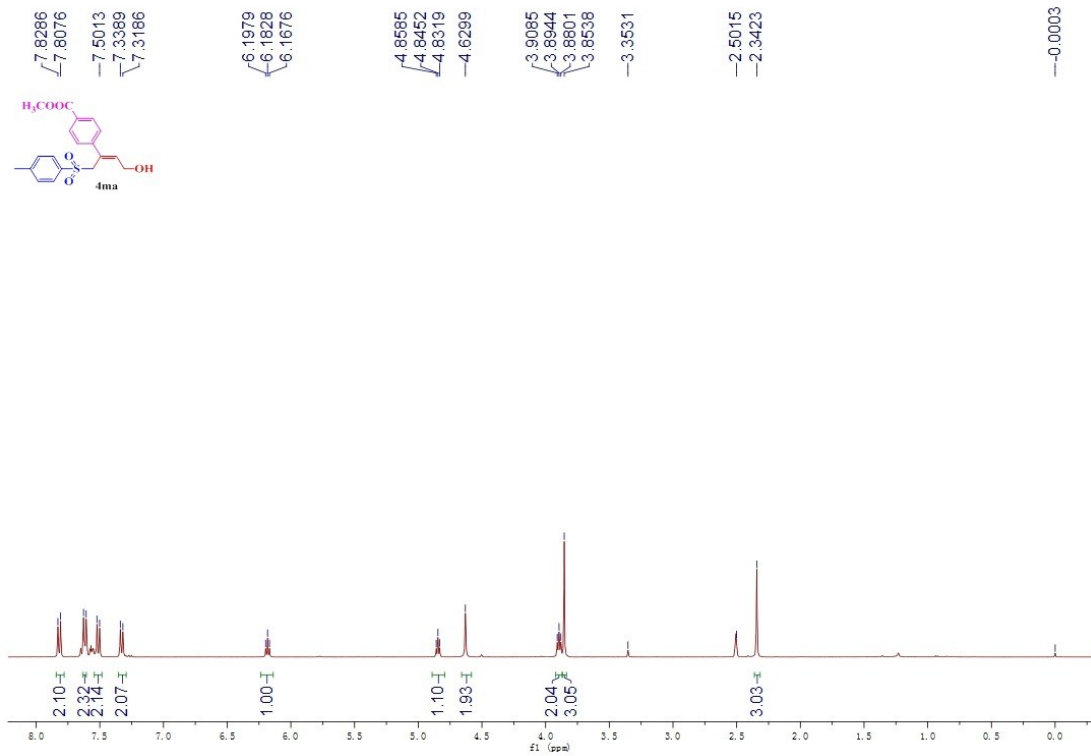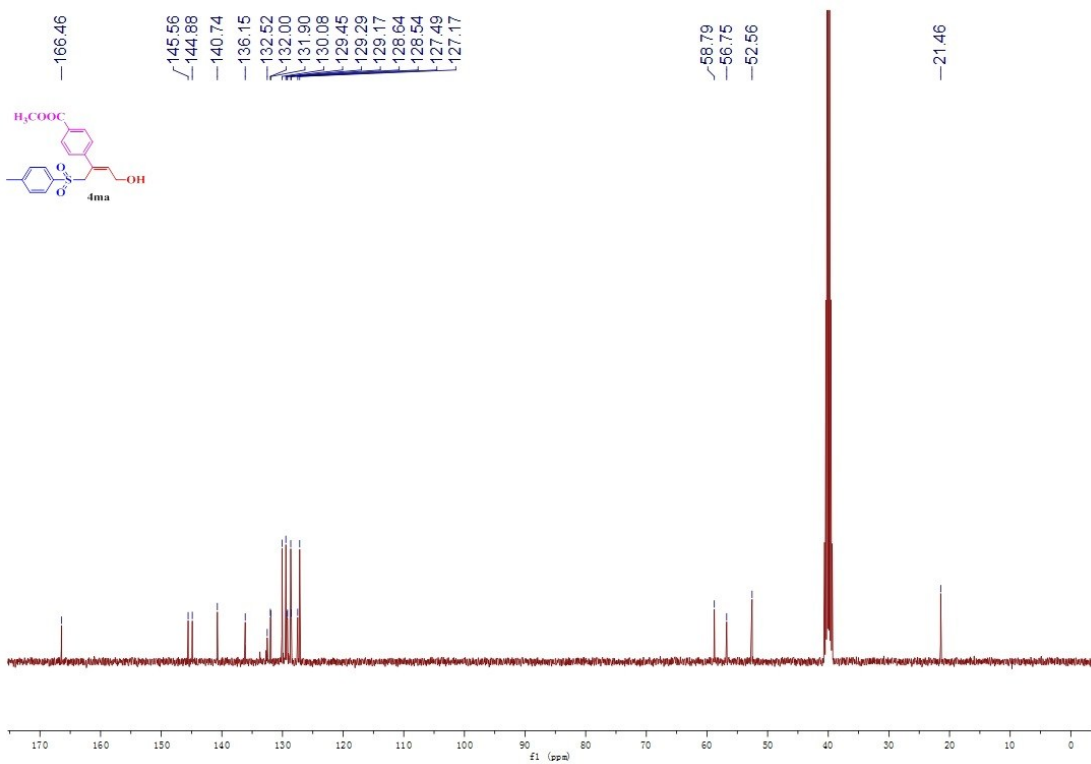

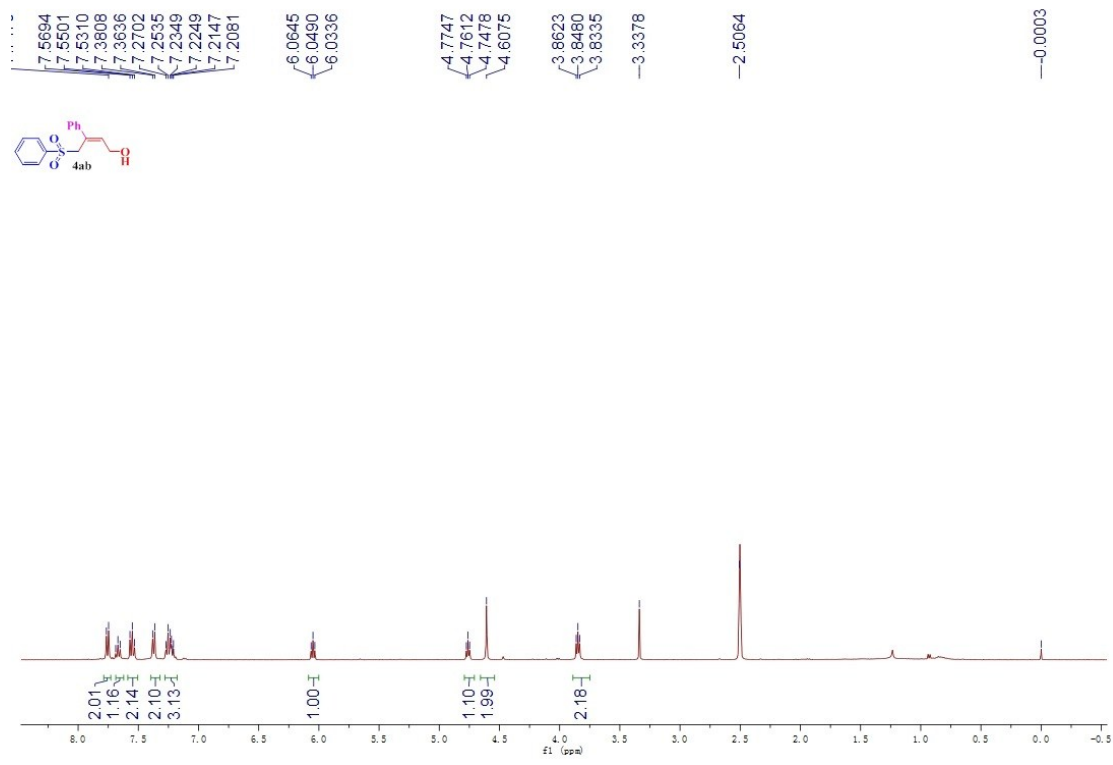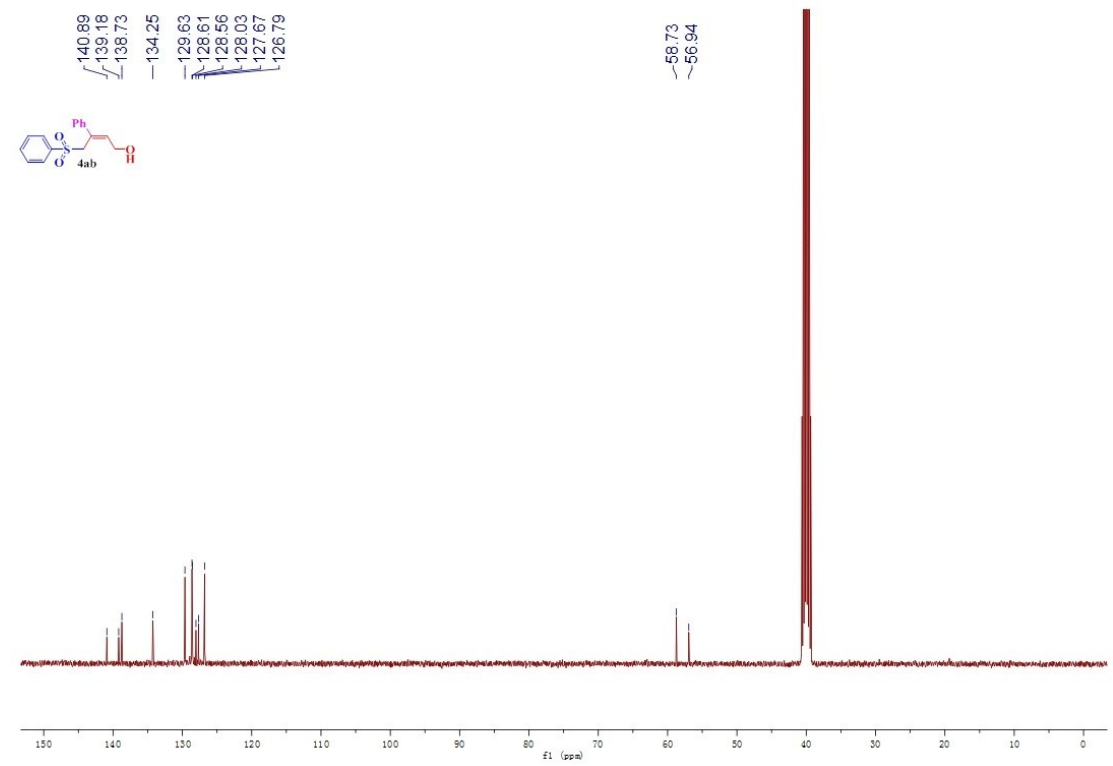

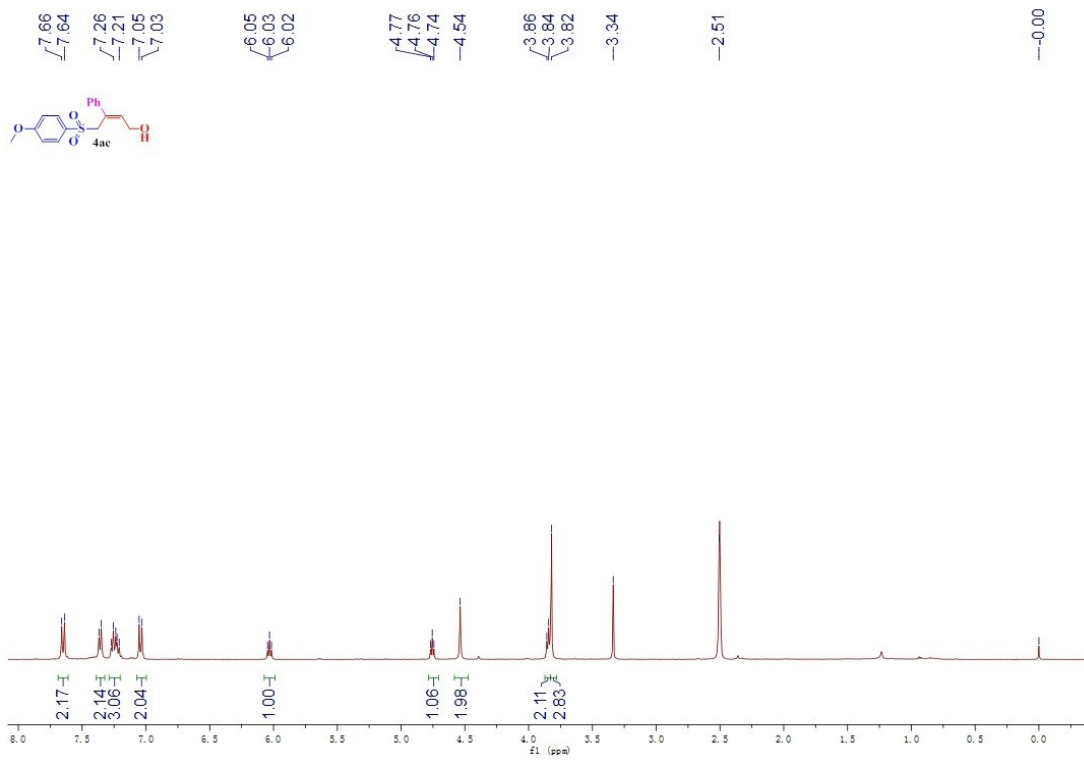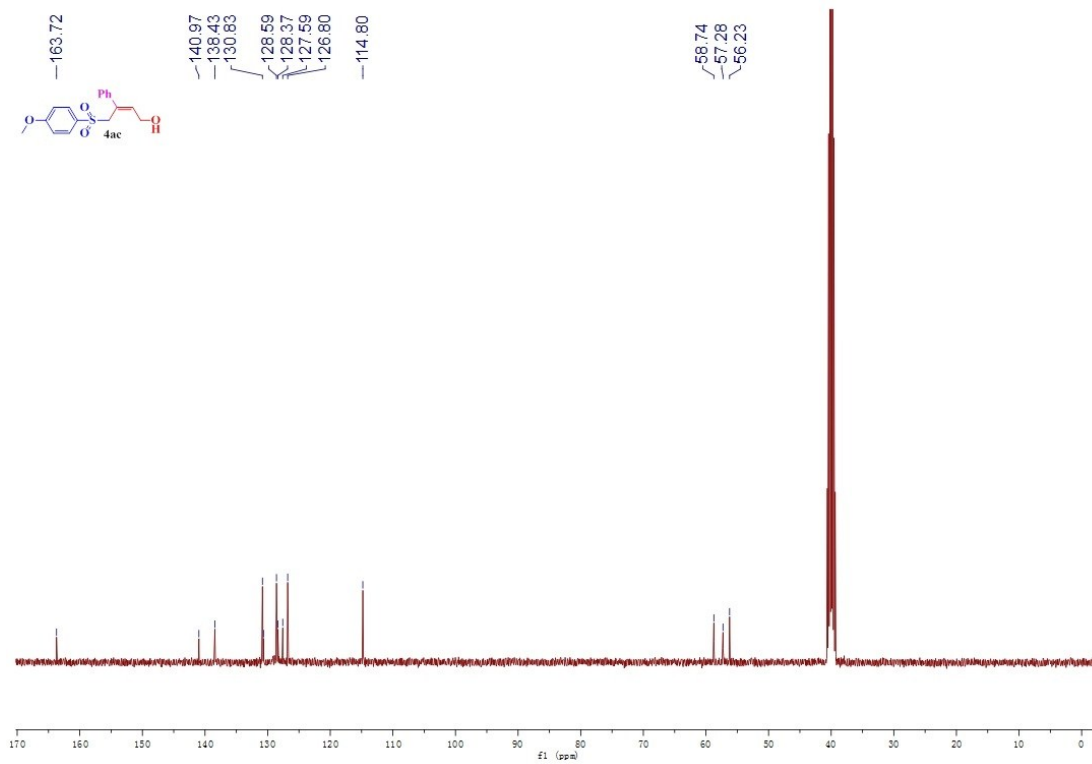

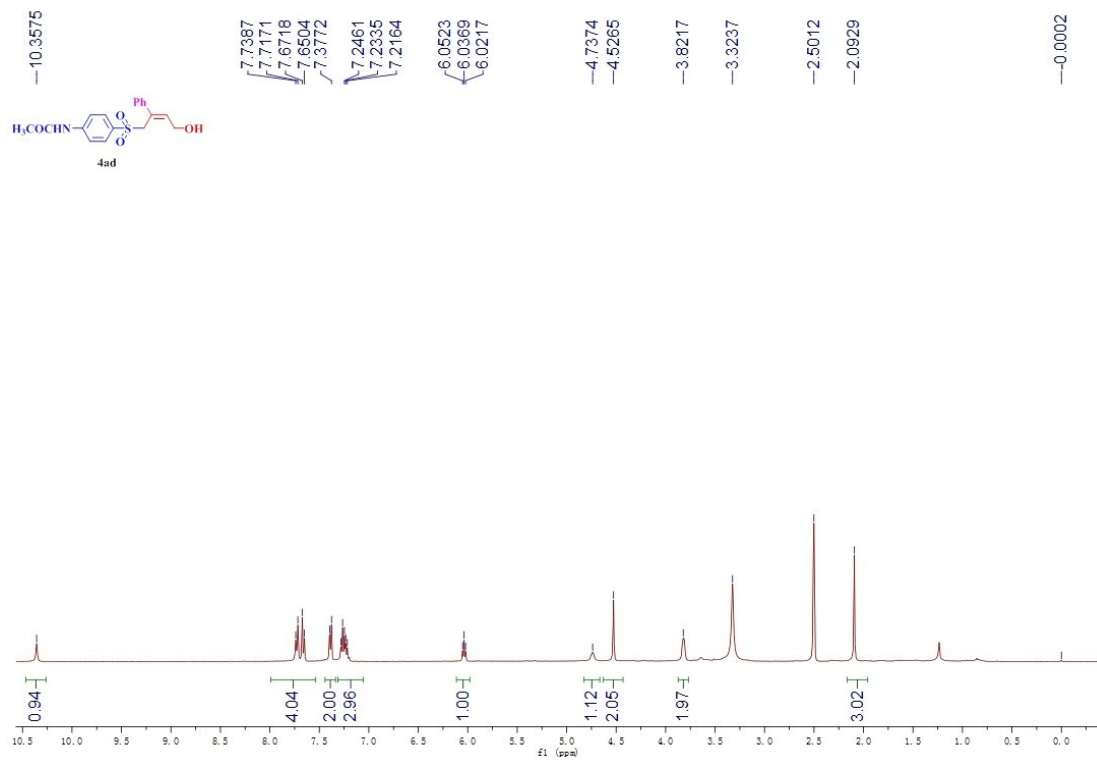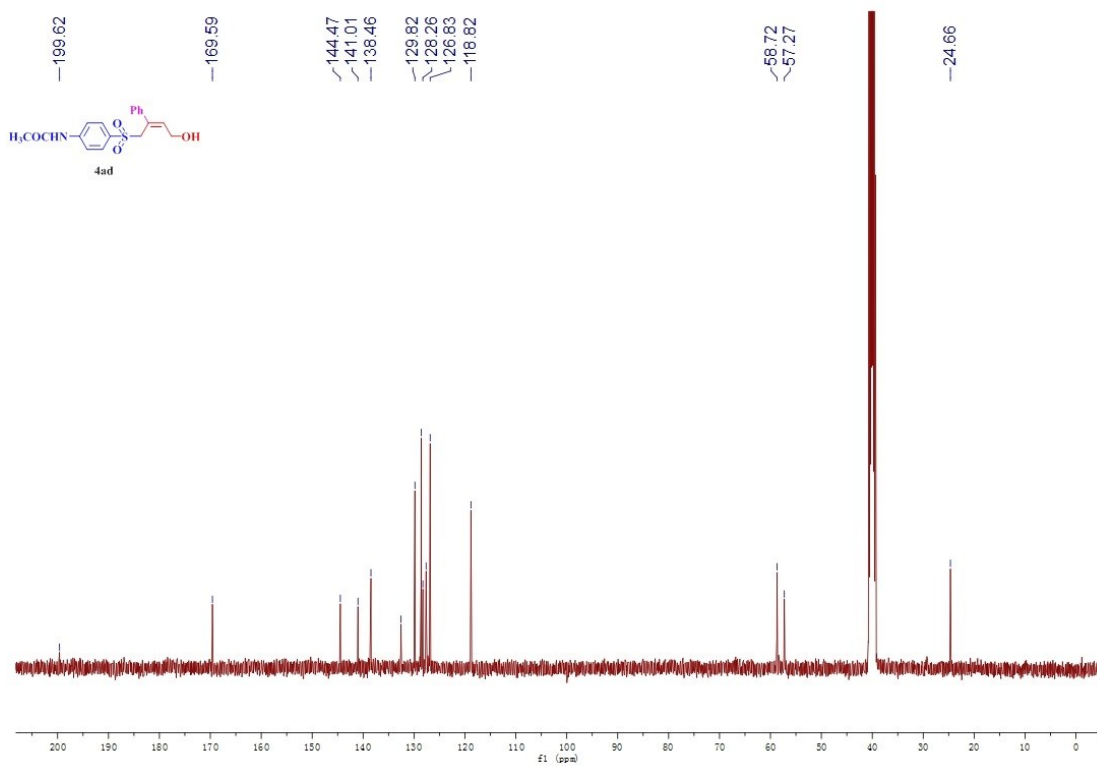

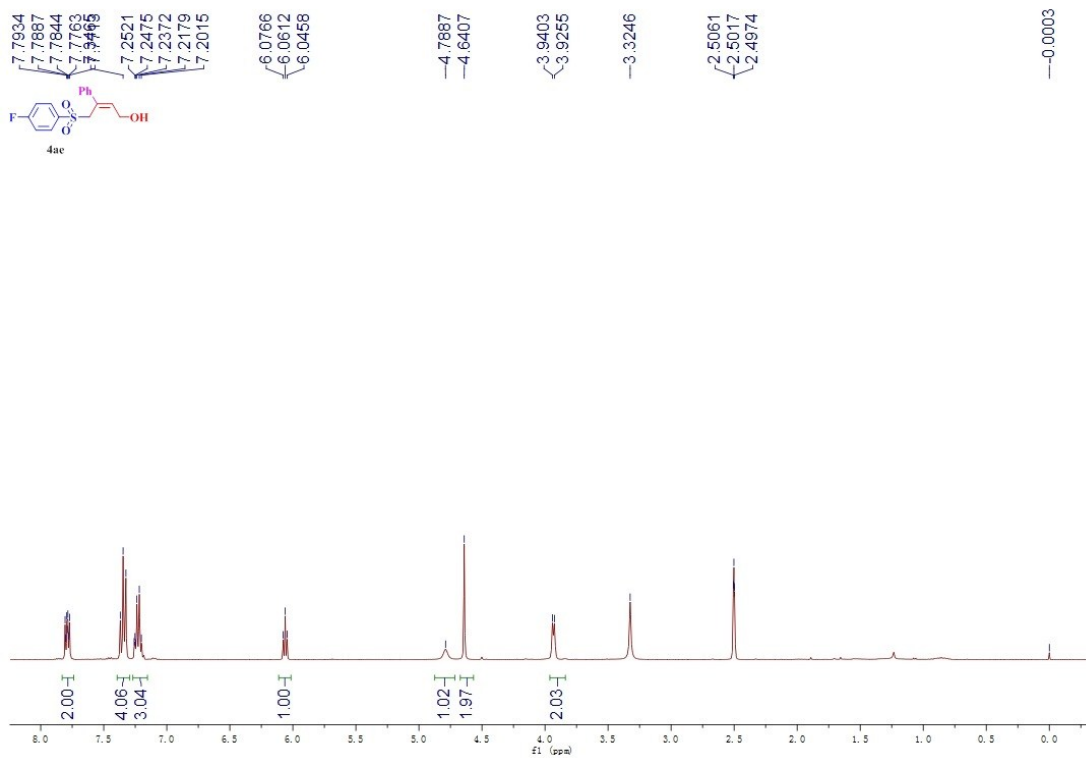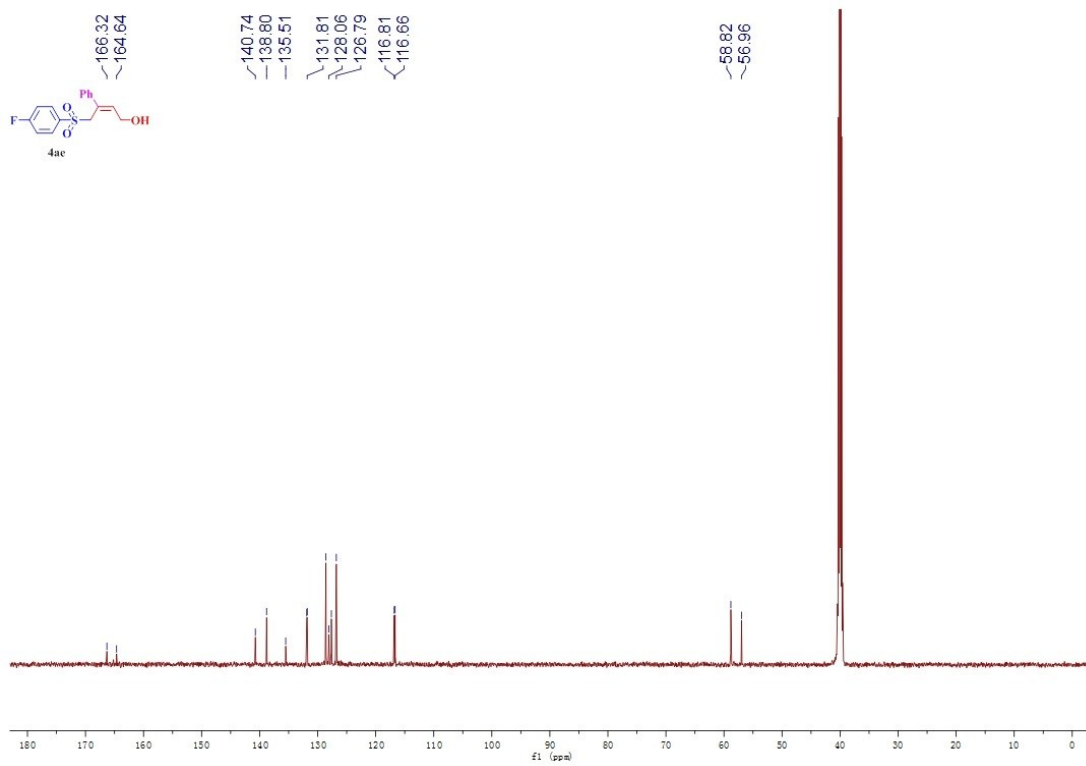



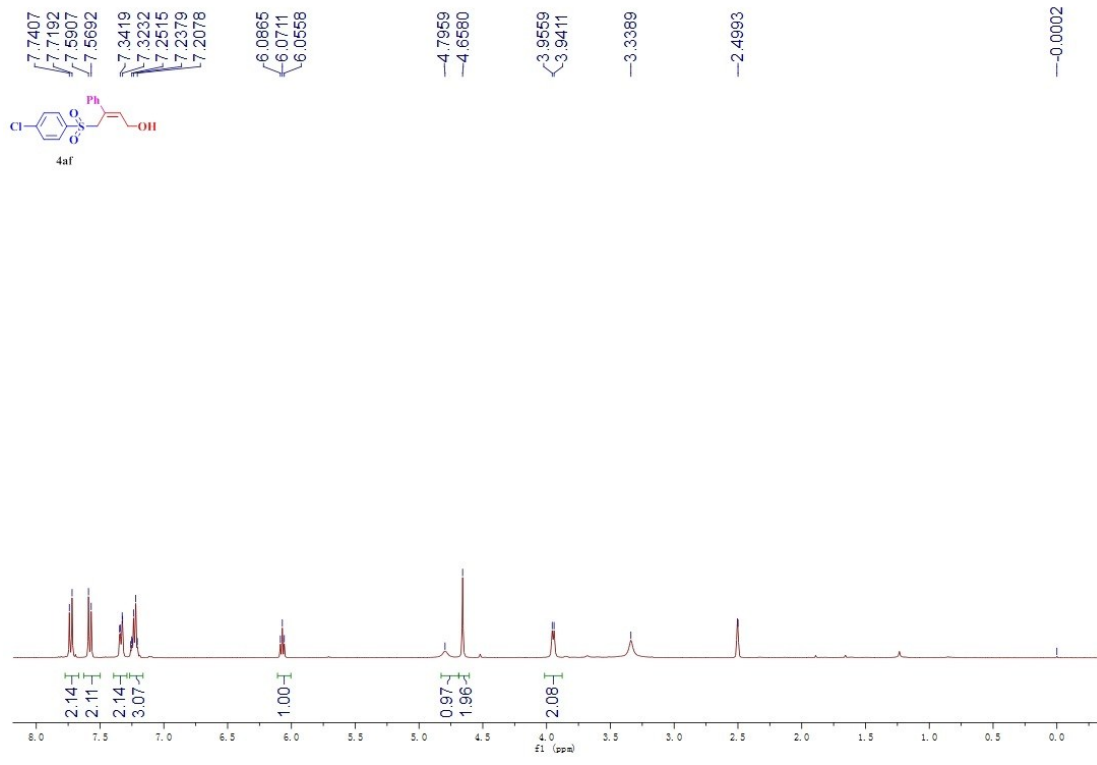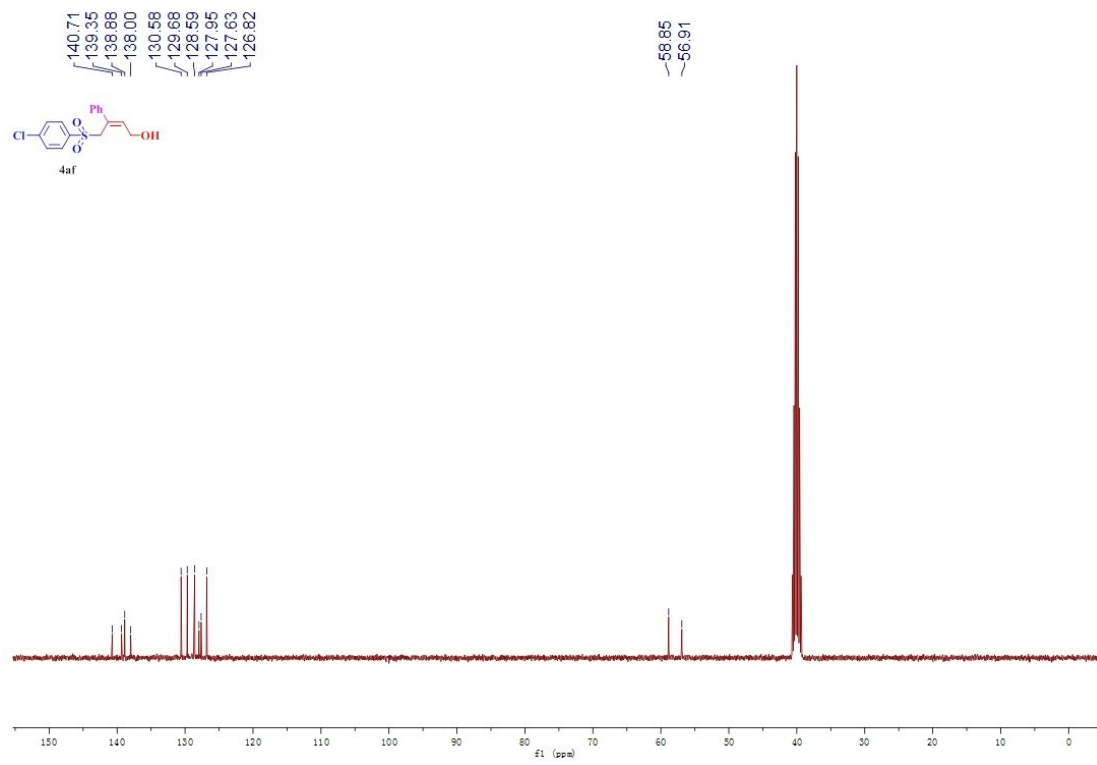

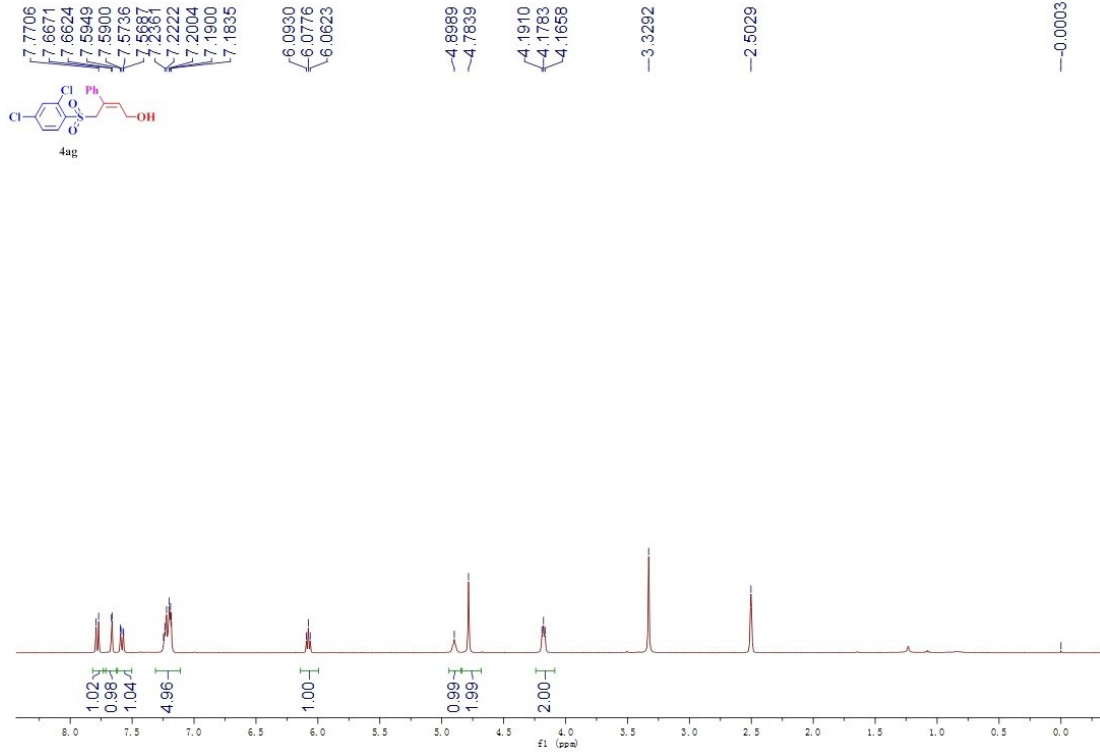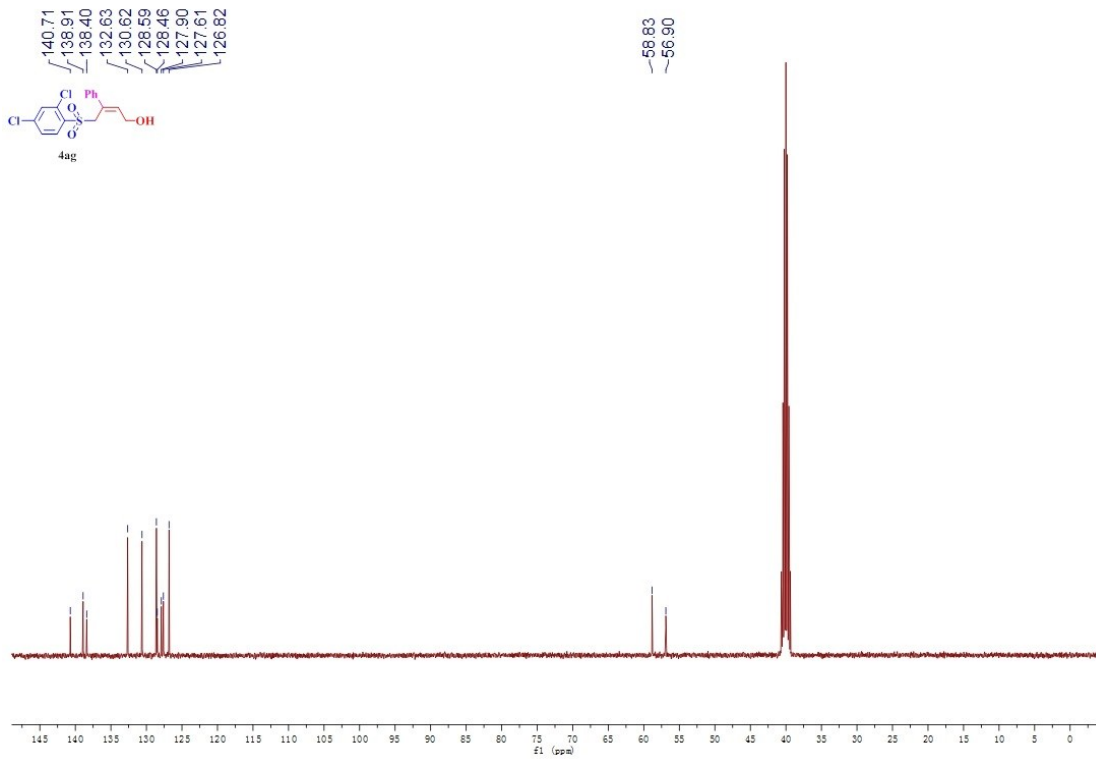

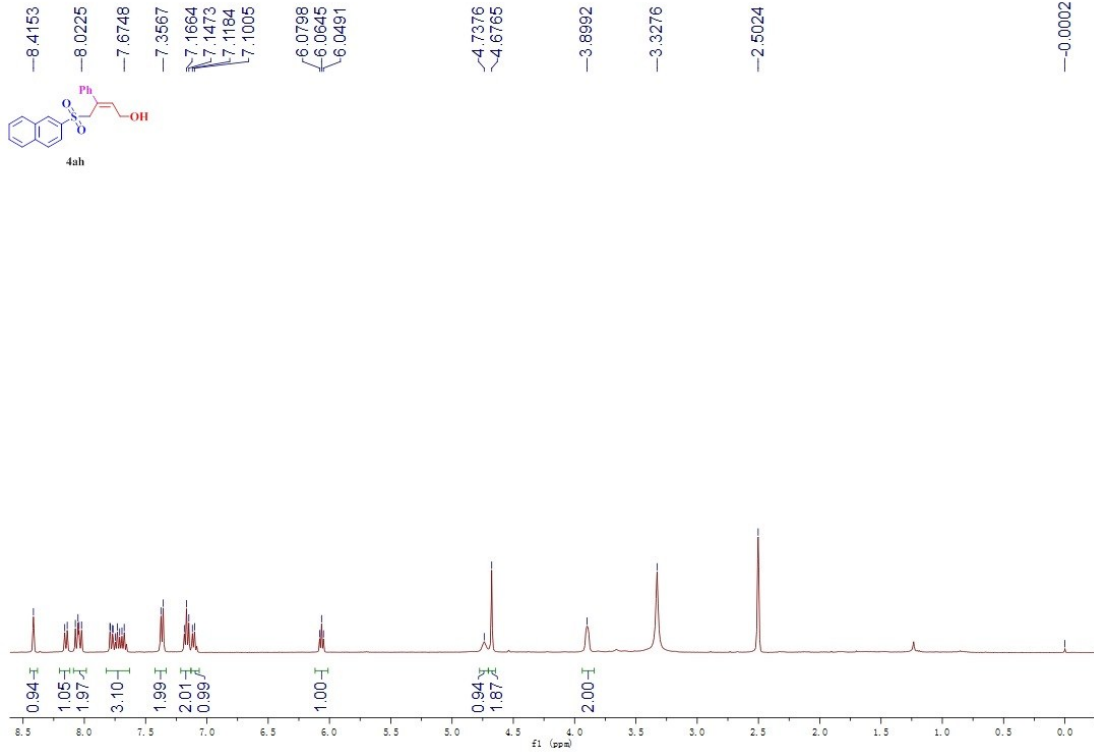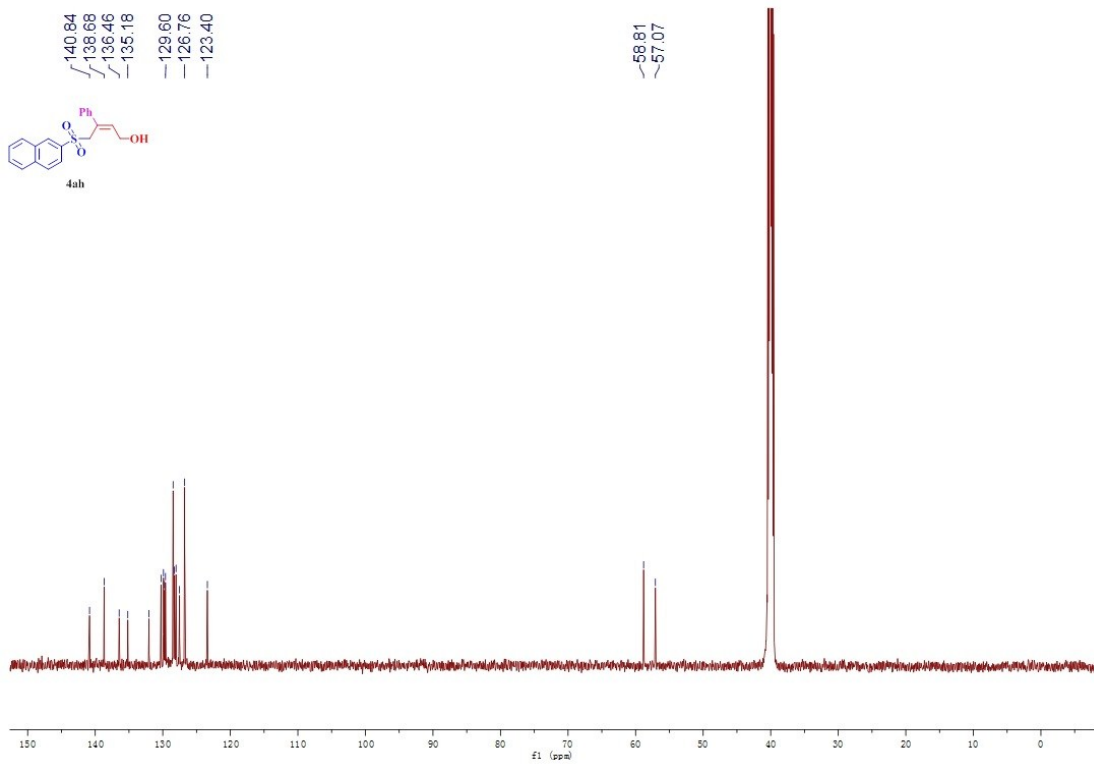

Supplement: c7ra08208h1.pdf [file c7ra08208h1.pdf]
